# Supplementary material
Source: PubMed Central journal article supplement (PMC6447430)
Supplement: NIHMS1521462-supplement-13361_2018_2125_MOESM1_ESM.pdf [file NIHMS1521462-supplement-13361_2018_2125_MOESM1_ESM.pdf]

## SUPPORTING INFORMATION

### Mapping Lipid Fragmentation for Tailored Mass Spectral Libraries

Paul D. Hutchins<sup>1,3</sup>, Jason D. Russell<sup>2,3</sup>, and Joshua J. Coon<sup>1,2,3,4,\*</sup>

<sup>1</sup>Department of Chemistry, University of Wisconsin–Madison, Madison, WI 53706, USA

<sup>2</sup>Morgridge Institute for Research, Madison, WI 53715, USA

<sup>3</sup>Genome Center of Wisconsin, Madison, WI 53706, USA

<sup>4</sup>Department of Biomolecular Chemistry, University of Wisconsin–Madison, Madison, WI 53706, USA

\* Corresponding author: [jcoon@chem.wisc.edu](mailto:jcoon@chem.wisc.edu)

#### Supplemental Methods

#### Supplemental Methods

**Supplementary Table 1.** Library Generation Standards

**Supplementary Table 2.** Library Validation Standards

**Supplementary Table 3.** LC-MS/MS Analysis Parameters for Q Exactive HF Analysis

**Supplementary Table 4.** LC-MS/MS Analysis Parameters for Orbitrap Fusion Lumos Analysis

**Supplementary Table 5.** Library Forge Processing Parameters

**Supplementary Table 6.** NIST 1950 SRM Processing Parameters

**Supplementary Figure 1:** Lipid Fragment Type Definitions

**Supplementary Figure 2:** Cer[AS] Reference Standard Spectrum

**Supplementary Figure 3-38:** Representative *in silico* spectra for HCD Hap1 Analysis

**Supplementary Figure 39:** Identification Confidence using Generated Libraries

**Supplementary Figure 40:** Dot Product Enhancement after Fragmentation Mapping

**Supplementary Figure 41:** NIST 1950 SRM Validation

**Supplementary Figure 42:** NIST 1950 SRM Identification Manual Validation

**Supplementary Figure 43:** LDA 2 Identification Dataset

## SUPPORTING INFORMATION

### Generation of Putative Identifications

For complex extract analysis, candidate lipid identifications are assigned to experimental MS/MS spectra using a modified dot-product spectral similarity score as described previously.<sup>1</sup> First, MS/MS spectra are converted to the Mascot Generic Format (MGF) and their intensities scaled relative to the most intense fragment in each spectrum. Each spectrum is then compared to all *in silico* lipid spectra whose precursor *m/z* values falls within a user-defined *m/z* tolerance of the experimental spectrum's parent ion *m/z*. To quantify spectral similarity between the *in silico* and experimental spectra, a modified dot-product score<sup>2</sup> is calculated which takes into account the correlation of fragment *m/z* values and fragment intensities between the spectra.

$$Dot\ Product = 1000 * \frac{(\sum A_{exp} * A_{lib})^2}{\sum A_{exp}^2 * \sum A_{lib}^2}$$

$$A = (Relative\ Intensity)^m * (m/z)^n$$

As described previously,<sup>1</sup> the intensity ( $m = 1.2$ ) and mass ( $n = 0.9$ ) weighting factors used were optimized on a set of lipids from the NIST Tandem Mass Spectral Library to return the maximum number of correct identifications and the maximum score separation between the correct match and the top-scoring incorrect match. For reference standard analysis, identifications are provided by the user in the form of a table of lipid names and retention times.

### Lipid MS/MS Processing

For each putative lipid identifications which rises above a user-supplied dot product threshold, the corresponding MS/MS scan is located and scaled to the most intense fragment ion. When analyzing reference standards, MS/MS spectra which fall within a user-supplied *m/z* and retention time tolerance are assigned to the provided lipid identification. All ions which fall below a relative

intensity threshold are removed to filter spectral noise. Additionally, the spectral signal-to-noise ratio is calculated using the ratio of the most intense fragment to the median intensity fragment. To remove low quality spectra which complicate fragmentation mapping, all spectra below a user-supplied S/N threshold are removed.

### **Spectral Clustering**

Spectra which are assigned the same putative identification are subsequently clustered to produce consensus spectra. First, replicate spectra are ranked according to the S/N and the dot product is calculated between the top ranked (reference) and second ranked spectra. If this dot product score rises above a user-supplied threshold (see Supplementary Table 5) the spectra are clustered together. This process is repeated until the dot product between the reference spectrum and all others has been calculated. If any spectra remain unclustered, the unclustered spectrum with the highest S/N ratio becomes the new reference spectrum and the clustering process is repeated with the remaining spectra. If no spectra are clustered with the reference spectrum, the reference spectrum is assigned to a “cluster” with itself and the next unclustered spectrum becomes the new reference spectrum.. This clustering process is continued until no spectra remain. To remove MS/MS spectra which contain co-fragmented lipids or were incorrectly identified, the cluster with the largest number of spectra is retained for further analysis. If two clusters contain the same number of spectra, the cluster with the highest average identification dot product score (for complex sample analysis) or the lowest retention time deviation (for reference standard analysis) is retained. For the remaining cluster, a consensus spectrum is created from all fragments present in a user-defined percentage of the clustered spectra using the median  $m/z$  and relative intensity.

### **Generating Annotation Spectra**

To reveal the underlying fragmentation pathways of each spectrum, Library Forge creates  $m/z$ -transformed spectra (annotation spectra) which make fragments which stem from the same fragmentation pathway isobaric. The type of transformation applied to each spectrum depends on the type and number of specific side chains present in the lipid as summarized in the table below:

| Fragment Type      | Transformation                           |
|--------------------|------------------------------------------|
| Fragment           | N/A                                      |
| Neutral Loss       | $m/z$ - precursor $m/z$                  |
| Chain Fragment     | $m/z$ - chain $m/z$                      |
| Chain Neutral Loss | $m/z$ - (precursor $m/z$ - chain $m/z$ ) |

Note that for lipids which contain two different side chains, two annotation spectra are created for the chain fragment and chain neutral loss types. To remove potentially spurious fragment annotations, each transformed  $m/z$  value must fall within the  $m/z$  ranges specified below:

| Fragment Type      | Rule(s)                                                                           |
|--------------------|-----------------------------------------------------------------------------------|
| Fragment           | $m/z < \text{adduct} + \text{headgroup} + \text{backbone} + \text{H}_2\text{O}_2$ |
| Neutral Loss       | $ m/z  < \text{adduct} + \text{headgroup} + \text{backbone}$ AND $m/z < 0$        |
| Chain Fragment     | $ m/z  < (\text{adduct} + \text{headgroup} + \text{backbone}) / 2$                |
| Chain Neutral Loss | $ m/z  < (\text{adduct} + \text{headgroup} + \text{backbone}) / 2$                |

Next, all annotation spectra which stem from a unique lipid class/adduct combination are linked together. Lipid class/adduct combinations which do not contain sufficient unique spectra, as defined by the user, are removed and consensus annotation spectra are subsequently created for each lipid class/adduct combination.

### Filtering Annotation Spectra

To remove spurious annotations, all transformed  $m/z$  values are filtered by the percent of annotation spectra in which they were observed. For chain-based annotation spectra, the

following equation is used to calculate this percentage as more than one chain-based spectra may be created if the lipid contains more than one of that type of chain.

$$\text{Percent Identified} = \frac{2 * \left(\frac{u_t}{c_t}\right) * f}{a}$$

$u_t$  = unique seed chains of type  $t$

$c_t$  = number of chains of type  $t$  for lipid class

$f$  = isobaric annotation fragments identified

$a$  = total annotation spectra for given fragment type

If a given fragment's percent identified score rises above a user-supplied threshold it is retained and used for *in silico* library generation. Because of lipids modular construction, some artefactual fragment rules are generated via the creation of annotation spectra. A simple example of these artifacts is one which stems from the inherent relationship between chain fragments and chain neutral loss in diacyl lipids where a neutral loss of one fatty acid is equivalent to a fatty acid fragment of the other acyl chain plus the headgroup of the lipid. Accordingly, when a particular  $m/z$  from the original spectra maps to more than one fragment definition (collisions), the rule which was identified in a greater percentage of the annotation spectra and has a lower rule modifier  $m/z$  is retained and all other colliding fragment rules are removed. Once filtered, the median  $m/z$  and relative intensity are calculated and used for *in silico* library generation.

## **NIST 1950 Analysis and Validation**

To validate the MS/MS identifications made using the *in silico* spectral libraries outlined in this manuscript, we generated an LC-MS/MS dataset consisting of triplicate analysis of the NIST 1950 SRM human plasma reference material. Extensively characterized in an interlaboratory study consisting of 31 laboratories, this reference material represents the best available method for

validating lipid identification pipelines. The LC-MS/MS data generated from analysis of the NIST 1950 SRM were processed using Compound Discoverer 2.0 (Thermo Scientific). First, all MS1 scans were extracted for feature detection (Select Spectra node) and the retention times were aligned (Align Retention Times node) across the LC-MS/MS experiments. Chromatographic features were then detected from the aligned scans (Detect Unknown Compounds node) and grouped according to common m/z and elution profile between experiments (Group Unknown Compounds node). Each LC-MS/MS experiment was then re-searched to reduce missing values in the dataset (Fill Gaps node). Feature groups whose area was less than three times the area in the blank injection were removed (Mark Background Compounds node). To generate an unaligned dataset for extraction of the unaligned retention times, MS1 scans were extracted (Select Spectra node) and features were detected directly from the unaligned scans (Detect Unknown Compounds node).

MS/MS Lipid identifications were generated using LipiDex to search spectra against the generated *in silico* libraries and map these identifications onto chromatographic features (see Supplementary Table 6 for parameters used). No additional manual filtering was applied to the dataset. When necessary, lipid identifications were converted to their sum identification (e.g. PC 16:0\_18:1 to PC 34:1) to permit comparison to the reported consensus NIST 1950 lipid identifications. Lipid identifications were considered “validated” if the identification was reported by at least three laboratories in the interlaboratory study.

### **Lipid Data Analyzer 2 Dataset**

To ensure that the successful generation of *in silico* lipid spectra in Library Forge did not stem from the original putative identifications having been generated by the same program we created a seed lipid identification set using a different lipid software: Lipid Data Analyzer 2 (LDA 2). Lipids from the Q Exactive HF HAP1 dataset were identified in LDA 2 using precursor mass matching parameters of 2 matching isotopes, 0.1% relative base peak cutoff, the Q Exactive positive and

negative mass lists from the Biological Experiment dataset ([http://genome.tugraz.at/lda2/data/Biological/Bio\\_QExactive.zip](http://genome.tugraz.at/lda2/data/Biological/Bio_QExactive.zip)), and the OrbiTrap\_exactive\_neg and OrbiTrap\_exactive\_MS/MS rule sets. All lipid identification report sheets were then reformatted into the LipiDex MS/MS identification result sheet format and imported into Library Forge for subsequent analysis. *In silico* libraries were generated in Library Forge using a target  $m/z$  tolerance of 15 ppm, minimum cluster dot product of 700, 3 minimum unique IDs, a fragment  $m/z$  tolerance of 0.02 Th, min. consensus spectra percent of 0%, minimum relative intensity of 15, minimum annotation spectra percent of 45% and a minimum MS/MS signal-to-noise ratio of 25.

**Supplementary Table 1.** Library Generation Standards. Show here is a list of all lipid reference standards used for library generation in Library Forge.

| Lipid                  | Vendor   | Mixture Name                                         |
|------------------------|----------|------------------------------------------------------|
| CDP DG 18:1_18:1       | Avanti   | -                                                    |
| CE 16:0(d7)            | Avanti   | -                                                    |
| Cer[NS] d18:1_17:0     | Avanti   | -                                                    |
| Cer1P d18:1_16:0       | Avanti   | -                                                    |
| DG 12:0_12:0           | Avanti   | -                                                    |
| DG 18:1_12:0           | Avanti   | -                                                    |
| LysoSM 18:1            | Cayman   | -                                                    |
| PC 15:0_15:0           | Avanti   | -                                                    |
| PS 14:0_14:0           | Avanti   | -                                                    |
| S1P d18:1              | Cayman   | -                                                    |
| SM d18:1_17:0          | Avanti   | -                                                    |
| TG 18:1_18:1_18:1      | Avanti   | -                                                    |
| TG 20:0_18:1_16:0      | Larodan  | -                                                    |
| CL 15:0_15:0_15:0_16:1 | Avanti   | Cardiolipin Mix I                                    |
| CL 22:1_22:1_22:1_14:1 | Avanti   | Cardiolipin Mix I                                    |
| CL 24:1_24:1_24:1_14:1 | Avanti   | Cardiolipin Mix I                                    |
| Cer[NS] d18:1_12:0     | Avanti   | Cer/Sph Mixture I                                    |
| Cer[NS] d18:1_25:0     | Avanti   | Cer/Sph Mixture I                                    |
| Cer1P d18:1_12:0       | Avanti   | Cer/Sph Mixture I                                    |
| GlcCer[NS] d18:1_12:0  | Avanti   | Cer/Sph Mixture I                                    |
| LacCer[NS] d18:1_12:0  | Avanti   | Cer/Sph Mixture I                                    |
| S1P d17:0              | Avanti   | Cer/Sph Mixture I                                    |
| S1P d17:1              | Avanti   | Cer/Sph Mixture I                                    |
| SM d18:1_12:0          | Avanti   | Cer/Sph Mixture I                                    |
| SP d17:0               | Avanti   | Cer/Sph Mixture I                                    |
| SP d17:1               | Avanti   | Cer/Sph Mixture I                                    |
| PS 14:1_14:1           | Avanti   | Ion Mobility Kit                                     |
| PE 14:1_14:1           | Avanti   | Ion Mobility Kit                                     |
| PG 14:1_14:1           | Avanti   | Ion Mobility Kit                                     |
| PI 14:1_14:1           | Avanti   | Ion Mobility Kit                                     |
| PA 14:1_14:1           | Avanti   | Ion Mobility Kit                                     |
| PC 14:1_14:1           | Avanti   | Ion Mobility Kit                                     |
| CL 14:1_14:1_14:1_15:1 | Avanti   | Ion Mobility Kit                                     |
| DG 14:1_14:1           | Avanti   | Ion Mobility Kit                                     |
| CE 19:0                | Avanti   | Ion Mobility Kit                                     |
| LysoPC 18:1            | Avanti   | Ion Mobility Kit                                     |
| Cer[NS] d18:1_18:1     | Avanti   | Ion Mobility Kit                                     |
| SM d18:1_18:1          | Avanti   | Ion Mobility Kit                                     |
| TG 18:0_18:0_18:0      | Avanti   | Ion Mobility Kit                                     |
| CE 16:0                | AB Sciex | Lipidyzer System Suitability Lipid Classes Light Mix |
| CE 16:1                | AB Sciex | Lipidyzer System Suitability Lipid Classes Light Mix |
| CE 18:1                | AB Sciex | Lipidyzer System Suitability Lipid Classes Light Mix |
| CE 18:2                | AB Sciex | Lipidyzer System Suitability Lipid Classes Light Mix |
| CE 20:3                | AB Sciex | Lipidyzer System Suitability Lipid Classes Light Mix |
| CE 20:4                | AB Sciex | Lipidyzer System Suitability Lipid Classes Light Mix |



**Supplementary Table 2.** Library Validation Standards. Show here is a list of all heavy isotope-labeled lipid reference standards used for library validation.

| Lipid                 | Manufacturer | Mixture Name                                  |
|-----------------------|--------------|-----------------------------------------------|
| CE 18:1(d7)           | Avanti       | SPLASH Standard                               |
| DG 15:0_18:1(d7)      | Avanti       | SPLASH Standard                               |
| Cholesterol(d7)       | Avanti       | SPLASH Standard                               |
| LysoPC 18:1(d7)       | Avanti       | SPLASH Standard                               |
| LysoPE 118:1(d7)      | Avanti       | SPLASH Standard                               |
| PA 15:0_18:1(d7)      | Avanti       | SPLASH Standard                               |
| PC 15:0_18:1(d7)      | Avanti       | SPLASH Standard                               |
| PE 15:0_18:1(d7)      | Avanti       | SPLASH Standard                               |
| PG 15:0_18:1(d7)      | Avanti       | SPLASH Standard                               |
| PI 15:0_18:1(d7)      | Avanti       | SPLASH Standard                               |
| PS 15:0_18:1(d7)      | Avanti       | SPLASH Standard                               |
| SM d18:1_18:1(d7)     | Avanti       | SPLASH Standard                               |
| TG 15:0_15:0_18:1(d7) | Avanti       | SPLASH Standard                               |
| MG 18:1(d7)           | Avanti       | SPLASH Standard                               |
| dCer[NS] 16:0         | AB Sciex     | Internal Standards Kit for Lipidyzer Platform |
| dCE 16:0              | AB Sciex     | Internal Standards Kit for Lipidyzer Platform |
| dCE 16:1              | AB Sciex     | Internal Standards Kit for Lipidyzer Platform |
| dCE 18:1              | AB Sciex     | Internal Standards Kit for Lipidyzer Platform |
| dCE 18:2              | AB Sciex     | Internal Standards Kit for Lipidyzer Platform |
| dCE 20:3              | AB Sciex     | Internal Standards Kit for Lipidyzer Platform |
| dCE 20:4              | AB Sciex     | Internal Standards Kit for Lipidyzer Platform |
| dCE 20:5              | AB Sciex     | Internal Standards Kit for Lipidyzer Platform |
| dCE 22:6              | AB Sciex     | Internal Standards Kit for Lipidyzer Platform |
| dDG 16:0/16:0         | AB Sciex     | Internal Standards Kit for Lipidyzer Platform |
| dDG 16:0/18:0         | AB Sciex     | Internal Standards Kit for Lipidyzer Platform |
| dDG 16:0/18:1         | AB Sciex     | Internal Standards Kit for Lipidyzer Platform |
| dDG 16:0/18:2         | AB Sciex     | Internal Standards Kit for Lipidyzer Platform |
| dDG 16:0/18:3         | AB Sciex     | Internal Standards Kit for Lipidyzer Platform |
| dDG 16:0/20:4         | AB Sciex     | Internal Standards Kit for Lipidyzer Platform |
| dDG 16:0/20:5         | AB Sciex     | Internal Standards Kit for Lipidyzer Platform |
| dDG 16:0/22:6         | AB Sciex     | Internal Standards Kit for Lipidyzer Platform |
| dFFA 16:0             | AB Sciex     | Internal Standards Kit for Lipidyzer Platform |
| dFFA 17:1             | AB Sciex     | Internal Standards Kit for Lipidyzer Platform |
| dLPC 16:0             | AB Sciex     | Internal Standards Kit for Lipidyzer Platform |
| dLPE 18:0             | AB Sciex     | Internal Standards Kit for Lipidyzer Platform |
| dPC 16:0/16:1         | AB Sciex     | Internal Standards Kit for Lipidyzer Platform |
| dPC 16:0/18:1         | AB Sciex     | Internal Standards Kit for Lipidyzer Platform |
| dPC 16:0/18:2         | AB Sciex     | Internal Standards Kit for Lipidyzer Platform |
| dPC 16:0/18:3         | AB Sciex     | Internal Standards Kit for Lipidyzer Platform |
| dPC 16:0/20:3         | AB Sciex     | Internal Standards Kit for Lipidyzer Platform |
| dPC 16:0/20:4         | AB Sciex     | Internal Standards Kit for Lipidyzer Platform |
| dPC 16:0/20:5         | AB Sciex     | Internal Standards Kit for Lipidyzer Platform |
| dPC 16:0/22:4         | AB Sciex     | Internal Standards Kit for Lipidyzer Platform |
| dPC 16:0/22:5         | AB Sciex     | Internal Standards Kit for Lipidyzer Platform |
| dPC 16:0/22:6         | AB Sciex     | Internal Standards Kit for Lipidyzer Platform |

|                 |          |                                               |
|-----------------|----------|-----------------------------------------------|
| dPE 18:0/18:1   | AB Sciex | Internal Standards Kit for Lipidyzer Platform |
| dPE 18:0/18:2   | AB Sciex | Internal Standards Kit for Lipidyzer Platform |
| dPE 18:0/18:3   | AB Sciex | Internal Standards Kit for Lipidyzer Platform |
| dPE 18:0/20:3   | AB Sciex | Internal Standards Kit for Lipidyzer Platform |
| dPE 18:0/20:4   | AB Sciex | Internal Standards Kit for Lipidyzer Platform |
| dPE 18:0/20:5   | AB Sciex | Internal Standards Kit for Lipidyzer Platform |
| dPE 18:0/22:5   | AB Sciex | Internal Standards Kit for Lipidyzer Platform |
| dPE 18:0/22:6   | AB Sciex | Internal Standards Kit for Lipidyzer Platform |
| dSM 16:0        | AB Sciex | Internal Standards Kit for Lipidyzer Platform |
| dSM 18:1        | AB Sciex | Internal Standards Kit for Lipidyzer Platform |
| dSM 24:0        | AB Sciex | Internal Standards Kit for Lipidyzer Platform |
| dSM 24:1        | AB Sciex | Internal Standards Kit for Lipidyzer Platform |
| dTG 50:1-FA16:0 | AB Sciex | Internal Standards Kit for Lipidyzer Platform |
| dTG 52:1-FA18:0 | AB Sciex | Internal Standards Kit for Lipidyzer Platform |
| dTG 52:2-FA18:1 | AB Sciex | Internal Standards Kit for Lipidyzer Platform |
| dTG 52:3-FA18:2 | AB Sciex | Internal Standards Kit for Lipidyzer Platform |
| dTG 52:4-FA18:3 | AB Sciex | Internal Standards Kit for Lipidyzer Platform |
| dTG 54:4-FA20:3 | AB Sciex | Internal Standards Kit for Lipidyzer Platform |
| dTG 54:5-FA20:4 | AB Sciex | Internal Standards Kit for Lipidyzer Platform |
| dTG 56:7-FA22:6 | AB Sciex | Internal Standards Kit for Lipidyzer Platform |
| dDCER 16:0      | AB Sciex | Internal Standards Kit for Lipidyzer Platform |
| dHCER 16:0      | AB Sciex | Internal Standards Kit for Lipidyzer Platform |
| dLCER 16:0      | AB Sciex | Internal Standards Kit for Lipidyzer Platform |

---

**Supplementary Table 3.** LC-MS/MS Analysis Parameters for Q Exactive HF Analysis. Detailed data collection and parameters for the HAP1 and reference standard dataset collected on the Q Exactive HF platform (Thermo) and presented in the manuscript.

| Q Exactive HF HAP1 Analysis |                       | Q Exactive HF Standard Analysis |                       |
|-----------------------------|-----------------------|---------------------------------|-----------------------|
| Positive Polarity           |                       | Positive Polarity               |                       |
| Parameter                   | Value                 | Parameter                       | Value                 |
| Polarity                    | positive              | Polarity                        | positive              |
| Full MS Resolution          | 15000                 | Full MS Resolution              | 30000                 |
| Full MS AGC Target          | 3.00E+06              | Full MS AGC Target              | 3.00E+06              |
| Full MS Max. IT (ms)        | 50                    | Full MS Max. IT (ms)            | 100                   |
| Full MS Scan Range          | <i>m/z</i> 500 - 1600 | Full MS Scan Range              | <i>m/z</i> 200 - 1400 |
| MS/MS Resolution            | 120,000               | MS/MS Resolution                | 15,000                |
| MS/MS AGC Target            | 1.00E+06              | MS/MS AGC Target                | 1.00E+06              |
| MS/MS Max. IT ( ms)         | 250                   | MS/MS Max. IT (ms)              | 400                   |
| MS/MS Loop Count            | 4                     | MS/MS Loop Count                | 5                     |
| MS/MS Isolation Window      | 0.4                   | MS/MS Isolation Window          | 1.4                   |
| MS/MS Stepped NCE           | 20, 25                | MS/MS Stepped NCE               | 20, 25                |
| Dynamic Exclusion (s)       | 10.0                  | Dynamic Exclusion (s)           | 10.0                  |
| Negative Polarity           |                       | Negative Polarity               |                       |
| Parameter                   | Value                 | Parameter                       | Value                 |
| Polarity                    | negative              | Polarity                        | negative              |
| Full MS Resolution          | 15000                 | Full MS Resolution              | 30000                 |
| Full MS AGC Target          | 3.00E+06              | Full MS AGC Target              | 3.00E+06              |
| Full MS Max. IT (ms)        | 50                    | Full MS Max. IT (ms)            | 100                   |
| Full MS Scan Range          | <i>m/z</i> 500 - 1600 | Full MS Scan Range              | <i>m/z</i> 200 - 1400 |
| MS/MS Resolution            | 120,000               | MS/MS Resolution                | 15,000                |
| MS/MS AGC Target            | 1.00E+06              | MS/MS AGC Target                | 1.00E+06              |
| MS/MS Max. IT ( ms)         | 250                   | MS/MS Max. IT ( ms)             | 400                   |
| MS/MS Loop Count            | 4                     | MS/MS Loop Count                | 5                     |
| MS/MS Isolation Window      | 0.4                   | MS/MS Isolation Window          | 1.4                   |
| MS/MS Stepped NCE           | 20, 25                | MS/MS Stepped NCE               | 20, 25                |
| Dynamic Exclusion (s)       | 10.0                  | Dynamic Exclusion (s)           | 10.0                  |
| HAP1 Analysis               |                       | Standard Analysis               |                       |
| Gradient (400 uL/min)       |                       | Gradient (300 uL/min)           |                       |
| Time                        | %B                    | Time                            | %B                    |
| 0.000                       | 2                     | 0.000                           | 10                    |
| 2.000                       | 2                     | 2.500                           | 10                    |
| 5.000                       | 30                    | 3.250                           | 40                    |
| 6.000                       | 50                    | 22.00                           | 50                    |
| 20.00                       | 85                    | 23.50                           | 75                    |
| 21.00                       | 99                    | 36.00                           | 80                    |
| 28.00                       | 99                    | 38.00                           | 99                    |
| 28.25                       | 2                     | 42.00                           | 99                    |
| 30.00                       | 2                     | 42.375                          | 10                    |
| -                           | -                     | 45.000                          | 10                    |

**Supplementary Table 4.** LC-MS/MS Analysis Parameters for Orbitrap Fusion Lumos Standard CAD analysis. Detailed data collection and parameters for the reference standard dataset collected on the Orbitrap Fusion Lumos platform (Thermo) and presented in the manuscript.

**Orbitrap Fusion Lumos  
Standard Analysis**

| <b>Positive Polarity</b> |                       | <b>Negative Polarity</b> |                       |
|--------------------------|-----------------------|--------------------------|-----------------------|
| Parameter                | Value                 | Parameter                | Value                 |
| Polarity                 | positive              | Polarity                 | positive              |
| Full MS Resolution       | 30000                 | Full MS Resolution       | 30000                 |
| Full MS AGC Target       | 1.00E+06              | Full MS AGC Target       | 1.00E+06              |
| Full MS Max. IT (ms)     | 50                    | Full MS Max. IT (ms)     | 50                    |
| Full MS Scan Range       | <i>m/z</i> 200 - 1400 | Full MS Scan Range       | <i>m/z</i> 200 - 1400 |
| MS/MS Resolution         | 120,000               | MS/MS Resolution         | 120,000               |
| MS/MS AGC Target         | 5.00E+05              | MS/MS AGC Target         | 5.00E+05              |
| MS/MS Max. IT ( ms)      | 400                   | MS/MS Max. IT ( ms)      | 400                   |
| MS/MS Isolation Window   | 2.1                   | MS/MS Isolation Window   | 2.1                   |
| Collision Energy (%)     | 35                    | Collision Energy (%)     | 35                    |
| Activation Time (ms)     | 10                    | Activation Time (ms)     | 10                    |
| Activation Q             | 0.25                  | Activation Q             | 0.25                  |
| Dynamic Exclusion (s)    | 10.0                  | Dynamic Exclusion (s)    | 10.0                  |

**Standard Analysis  
Gradient (300 uL/min)**

| Time   | %B |
|--------|----|
| 0.000  | 10 |
| 2.500  | 10 |
| 3.250  | 40 |
| 22.00  | 50 |
| 23.50  | 75 |
| 36.00  | 80 |
| 38.00  | 99 |
| 42.00  | 99 |
| 42.375 | 10 |
| 45.000 | 10 |
| 0.000  | 10 |
| 2.500  | 10 |

**Supplementary Table 5.** Library Forge Processing Parameters. Detailed data processing parameters for the library generation from LipiDex identifications presented in the manuscript.

**QE HF HCD HAP1 Analysis**

| Parameter                        | Value |
|----------------------------------|-------|
| Target m/z Tolerance (ppm)       | 15    |
| Target Retention Tolerance (min) | 1     |
| Minimum ID Dot Product           | 200   |
| Minimum Cluster Dot Product      | 700   |
| Minimum Unique IDs               | 2     |
| Fragment m/z Tolerance (Th)      | 0.01  |
| Min. Consensus Spectra %         | 0     |
| Minimum Relative Intensity       | 15    |
| Min. Annotation Spectra %        | 65    |
| Min. MS/MS Signal-to-Noise       | 50    |

**QE HF HCD Standards Analysis**

| Parameter                        | Value |
|----------------------------------|-------|
| Target m/z Tolerance (ppm)       | 15    |
| Target Retention Tolerance (min) | 1     |
| Minimum ID Dot Product           | 200   |
| Minimum Cluster Dot Product      | 700   |
| Minimum Unique IDs               | 2     |
| Fragment m/z Tolerance (Th)      | 0.01  |
| Min. Consensus Spectra %         | 0     |
| Minimum Relative Intensity       | 5     |
| Min. Annotation Spectra %        | 65    |
| Min. MS/MS Signal-to-Noise       | 50    |

**QE HF HCD HAP1 Analysis  
LipidBlast Seed Library**

| Parameter                        | Value |
|----------------------------------|-------|
| Target m/z Tolerance (ppm)       | 15    |
| Target Retention Tolerance (min) | 1     |
| Minimum ID Dot Product           | 50    |
| Minimum Cluster Dot Product      | 700   |
| Minimum Unique IDs               | 2     |
| Fragment m/z Tolerance (Th)      | 0.01  |
| Min. Consensus Spectra %         | 0     |
| Minimum Relative Intensity       | 20    |
| Min. Annotation Spectra %        | 65    |
| Min. MS/MS Signal-to-Noise       | 100   |

**Fusion Lumos CAD Standard Analysis**

| Parameter                        | Value |
|----------------------------------|-------|
| Target m/z Tolerance (ppm)       | 20    |
| Target Retention Tolerance (min) | 1     |
| Minimum ID Dot Product           | 200   |
| Minimum Cluster Dot Product      | 700   |
| Minimum Unique IDs               | 2     |
| Fragment m/z Tolerance (Th)      | 0.02  |
| Min. Consensus Spectra %         | 0     |
| Minimum Relative Intensity       | 20    |
| Min. Annotation Spectra %        | 65    |
| Min. MS/MS Signal-to-Noise       | 100   |

**Supplementary Table 6.**

Detailed Compound Discoverer and LipiDex processing parameters for the NIST 1950 validation dataset presented in the manuscript.

| <b>Select Spectra</b>                     |                                            | <b>Group Unknown Compounds</b>     |                      |
|-------------------------------------------|--------------------------------------------|------------------------------------|----------------------|
| Parameter                                 | Value                                      | Parameter                          | Value                |
| Precursor Selection                       | Use MS(n - 1) Precursor                    | Mass Tolerance                     | 10 ppm               |
| Lower RT Limit                            | 1.4                                        | RT Tolerance [min]                 | 0.2                  |
| Upper RT Limit                            | 21                                         | Rule #1                            | Unspecified          |
| Scan Type                                 | Is Full                                    | Rule #2                            | Unspecified          |
| Polarity Mode                             | Is +/-                                     | Preferred MS Order                 | MS1                  |
| S/N Threshold (FT-only)                   | 1.5                                        | Preferred Ion                      | [M+H] <sup>+</sup> 1 |
| Unrecognized Charge Replacement           | 1                                          |                                    |                      |
| Unrecognized Mass Analyzer Replacement    | FTMS                                       |                                    |                      |
| Unrecognized MS Order Replacements        | MS1                                        |                                    |                      |
| Unrecognized Activation Type Replacements | HCD                                        |                                    |                      |
| Unrecognized Polarity Replacements        | +                                          |                                    |                      |
| Unrecognized MS Resolution Replacements   | 60000                                      |                                    |                      |
| Unrecognized MSn Resolution Replacements  | 30000                                      |                                    |                      |
| <b>Align Retention Times</b>              |                                            | <b>Fill Gaps</b>                   |                      |
| Parameter                                 | Value                                      | Parameter                          | Value                |
| Alignment Model                           | Adaptive Curve                             | Mass Tolerance                     | 10 ppm               |
| Alignment Fallback                        | Use Linear Model                           | RT Tolerance [min]                 | 0.2                  |
| Maximum Shift [min]                       | 0.5                                        | S/N Threshold                      | 1.5                  |
| Shift Reference File                      | TRUE                                       |                                    |                      |
| Mass Tolerance                            | 20 ppm                                     |                                    |                      |
| Remove Outlier                            | TRUE                                       |                                    |                      |
| <b>Detect Unknown Compounds</b>           |                                            | <b>Mark Background Compounds</b>   |                      |
| Parameter                                 | Value                                      | Parameter                          | Value                |
| Mass Tolerance (ppm)                      | 10 ppm                                     | Max. Sample/Blank                  | 3                    |
| Intensity Tolerance (%)                   | 100                                        | Max. Blank/Sample                  | 0                    |
| S/N Threshold                             | 3                                          | Hide Background                    | TRUE                 |
| Min. Peak Intensity                       | 100000                                     |                                    |                      |
| Ions                                      | [M+H] <sup>+</sup> 1; [M-H] <sup>-</sup> 1 |                                    |                      |
| Min. Element Counts                       | C H                                        |                                    |                      |
| Max. Element Counts                       | C100 H190 N10 Na2 O15 P2 S2                |                                    |                      |
|                                           |                                            | <b>Spectrum Searcher (LipiDex)</b> |                      |
|                                           |                                            | Parameter                          | Value                |
|                                           |                                            | MS1 Search Tolerance               | 0.01 Th              |
|                                           |                                            | MS2 Search Tolerance               | 0.02 Th              |
|                                           |                                            | MS2 Low Mass Cutoff                | 61 Th                |
|                                           |                                            | <b>Peak Finder (LipiDex)</b>       |                      |
|                                           |                                            | Parameter                          | Value                |
|                                           |                                            | File Type                          | Compound Discoverer  |
|                                           |                                            | Min. Lipid Spectral Purity         | 75%                  |
|                                           |                                            | Min. MS2 Search Dot Prod.          | 500                  |
|                                           |                                            | Min MS2 Search Rev. Dot Product    | 700                  |
|                                           |                                            | FWHM Window Multiplier             | 2                    |
|                                           |                                            | Max. Mass Difference               | 15 ppm               |
|                                           |                                            | Max. RT M.A.D. Factor              | 3.5                  |
|                                           |                                            | Feature Found in n Files           | 1                    |

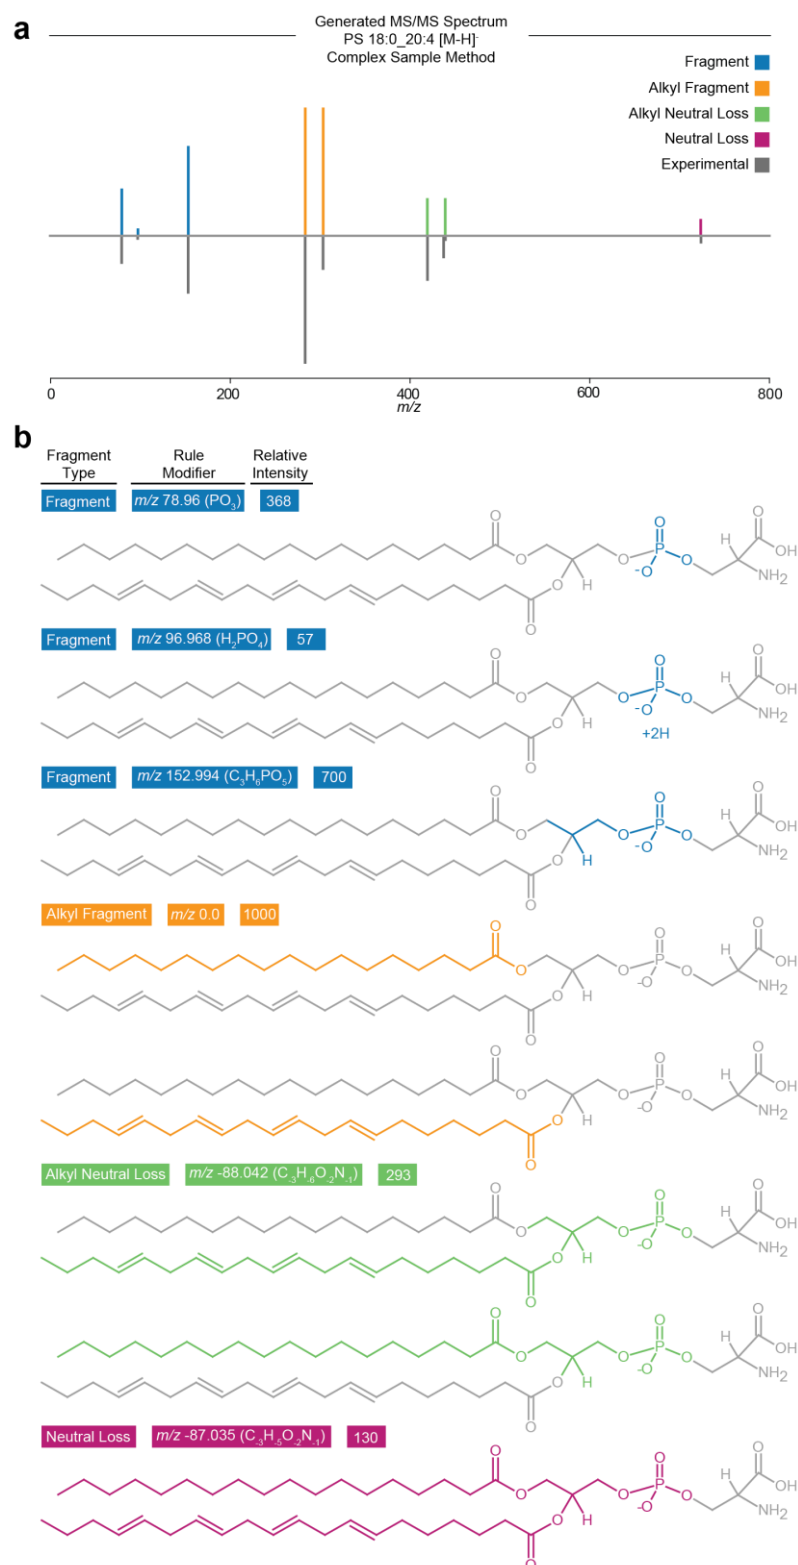

**Supplementary Figure 1:** (a) *In-silico* generated and experimental spectrum for PS 18:0\_20:4 [M-H]<sup>-</sup>. (b) Structural representation of PS 18:0\_20:4 [M-H]<sup>-</sup> fragments (colored atoms). Note these fragment structures are used for depiction of fragment types and are not meant to reflect actual gas-phase structures.

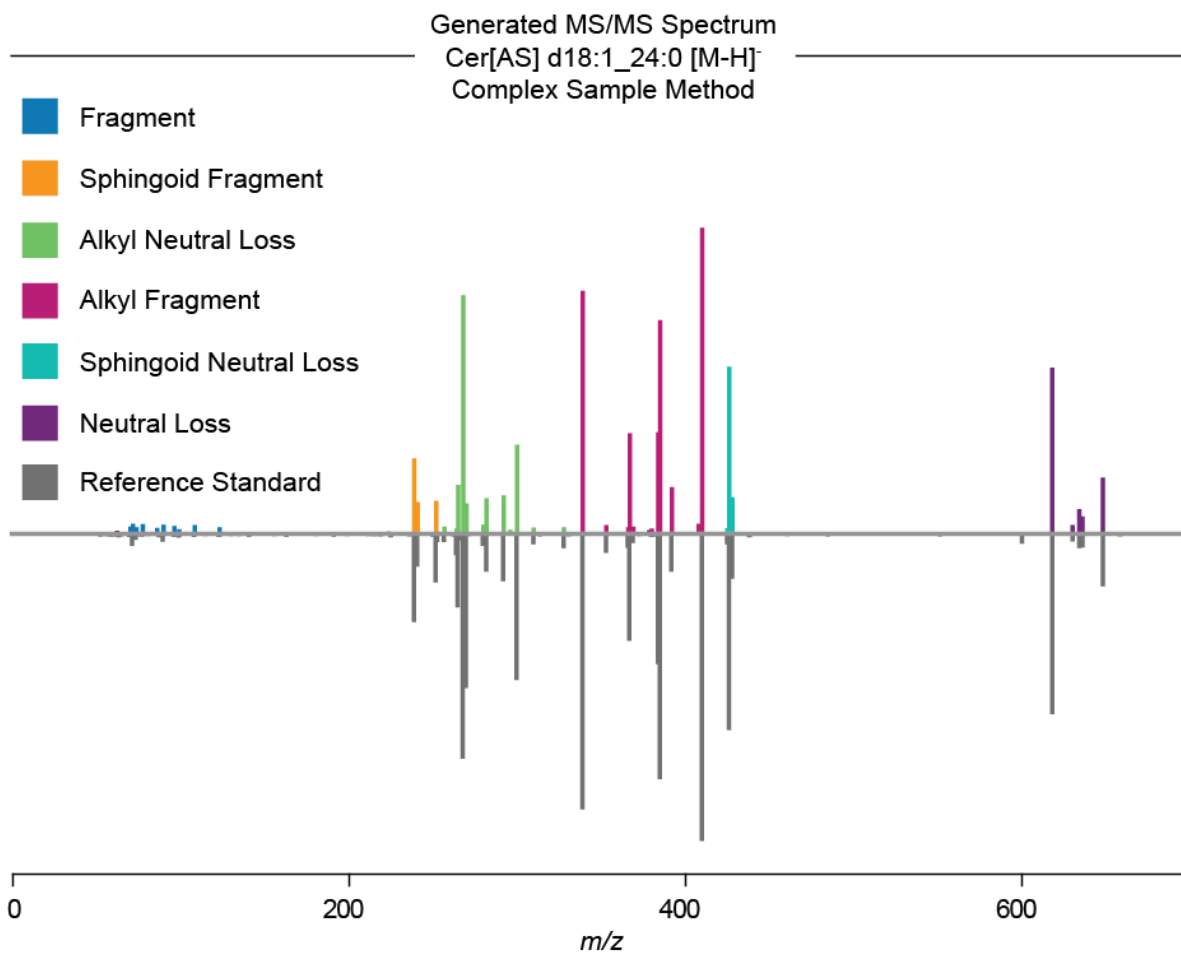

**Supplementary Figure 2:** Cer[AS] Reference Standard Spectrum. Reference standard MS/MS spectra (dark grey) and generated in-silico (colored) spectra for Cer[AS] d18:1\_24:0 [M-H]<sup>-</sup>.

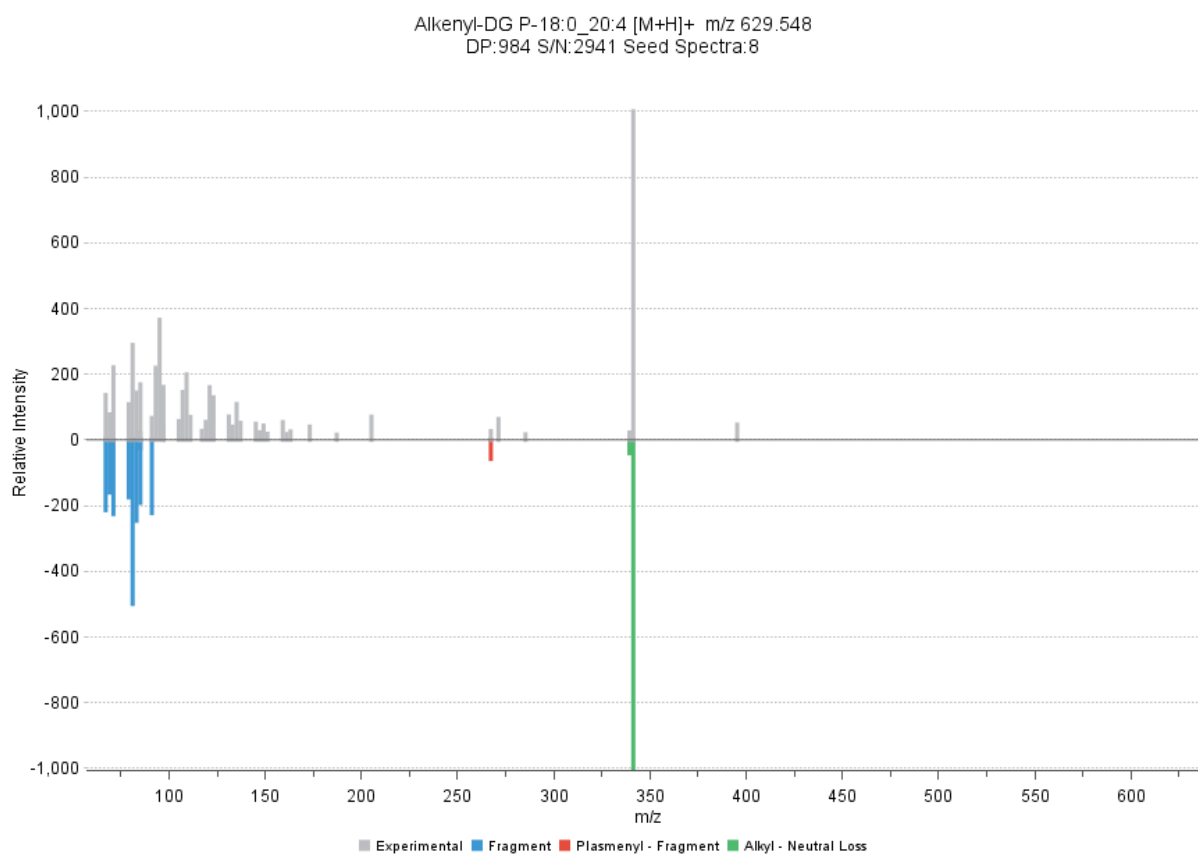

**Supplementary Figure 3:** Representative experimental (grey) and *in silico* (colored) Alkenyl-DG [M+H]<sup>+</sup> spectra generated from the complex HAP1 extract using the LipiDex HCD Acetate library as the seed library.

Mass spectrum plot showing Relative Intensity (Y-axis, ranging from -1,000 to 1,000) versus m/z (X-axis, ranging from 200 to 1,400). The plot displays four data series:

- Experimental (Grey bars)
- Fragment (Blue bars)
- Alkyl - Fragment (Red bars)
- Alkyl - Cardiolipin DG Fragment (Green bars)

The plot illustrates the relative intensities of various mass fragments across the m/z range, with the Experimental spectrum showing the highest overall intensity, peaking near 1,000 at m/z 277.

19

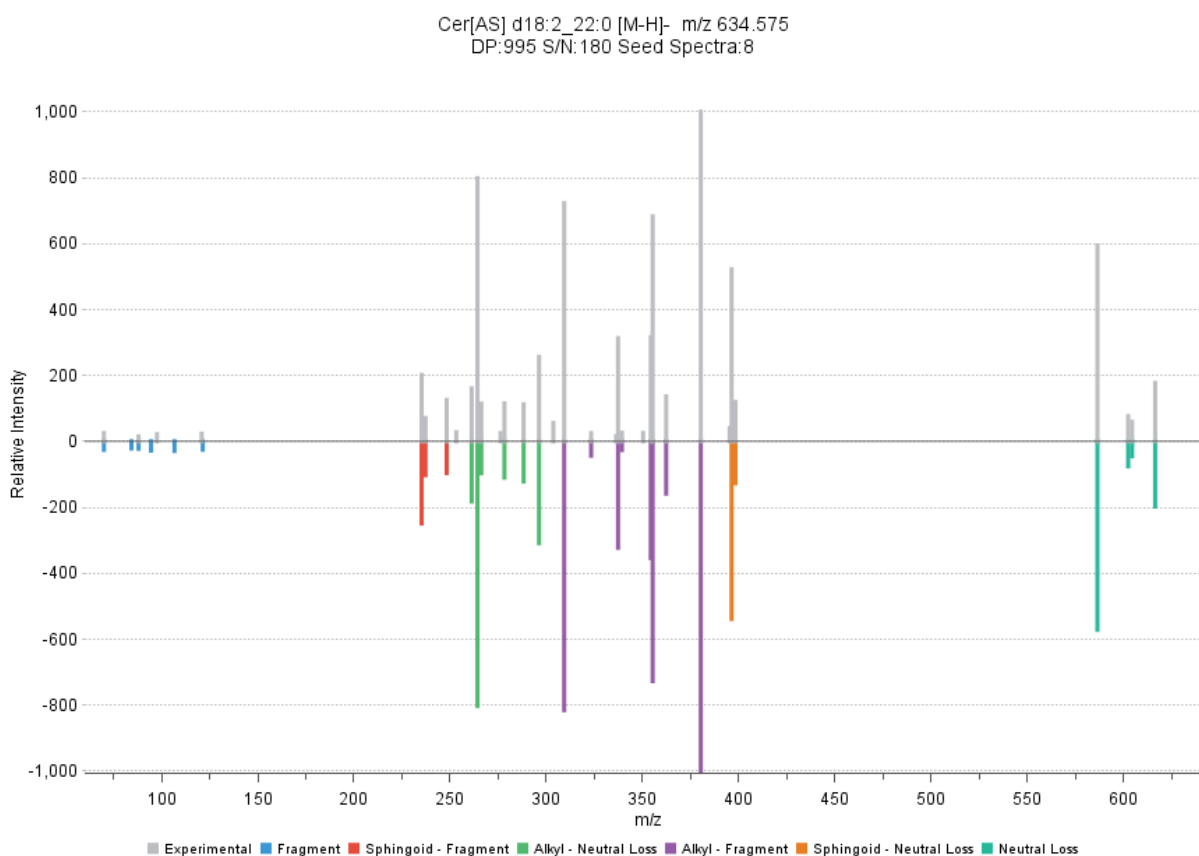

**Supplementary Figure 5:** Representative experimental (grey) and *in silico* (colored) Cer[AS] [M-H]<sup>-</sup> spectra generated from the complex HAP1 extract using the LipiDex HCD Acetate library as the seed library.

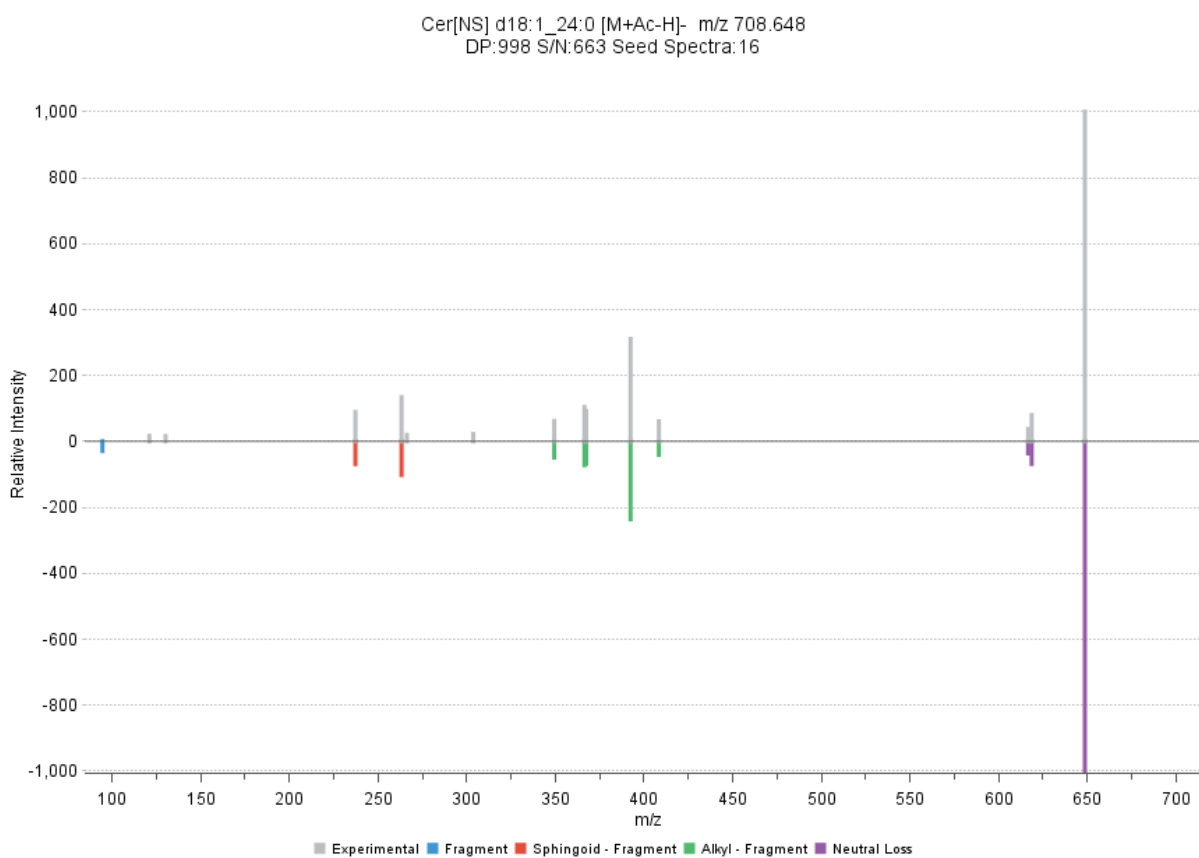

**Supplementary Figure 6:** Representative experimental (grey) and *in silico* (colored) Cer[NS] [M+Ac-H]<sup>-</sup> spectra generated from the complex HAP1 extract using the LipiDex HCD Acetate library as the seed library.

Cer[NS] d18:1\_16:0 [M+H-H<sub>2</sub>O]<sup>+</sup> m/z 520.506  
DP:1000 S/N:16396 Seed Spectra: 18

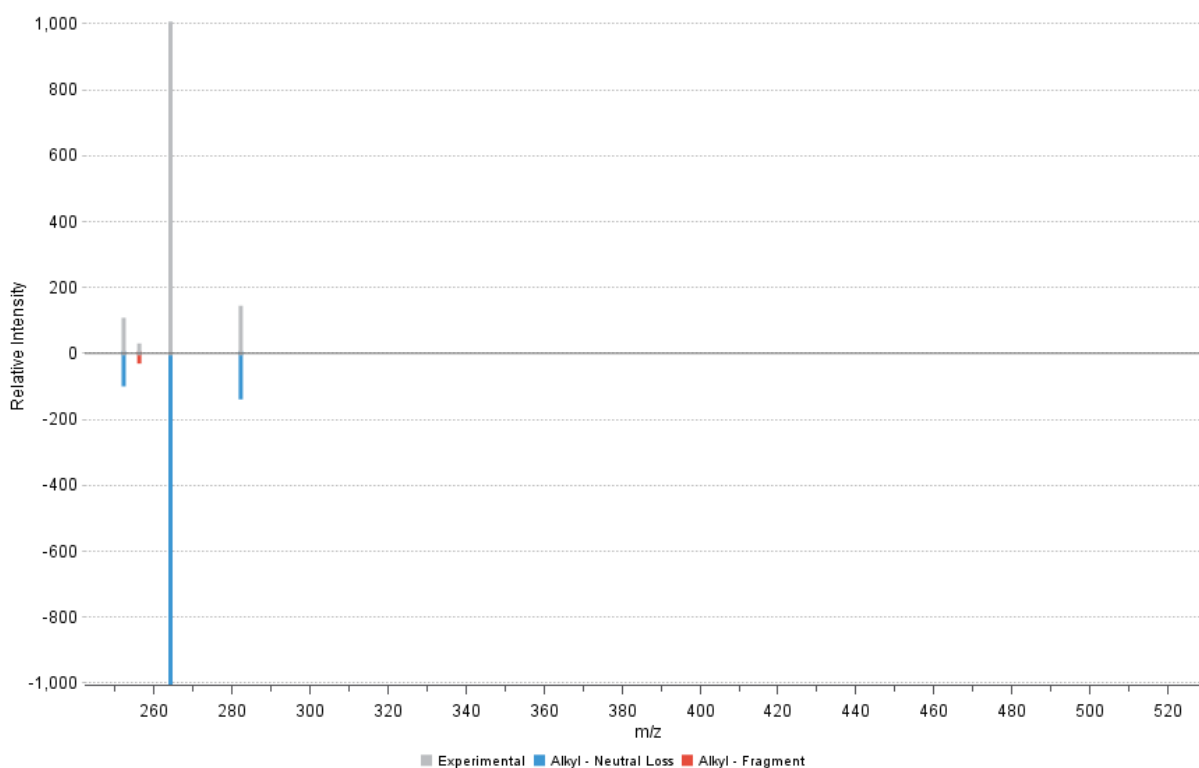

**Supplementary Figure 7:** Representative experimental (grey) and *in silico* (colored) Cer[NS] [M+H-H<sub>2</sub>O]<sup>+</sup> spectra generated from the complex HAP1 extract using the LipiDex HCD Acetate library as the seed library.

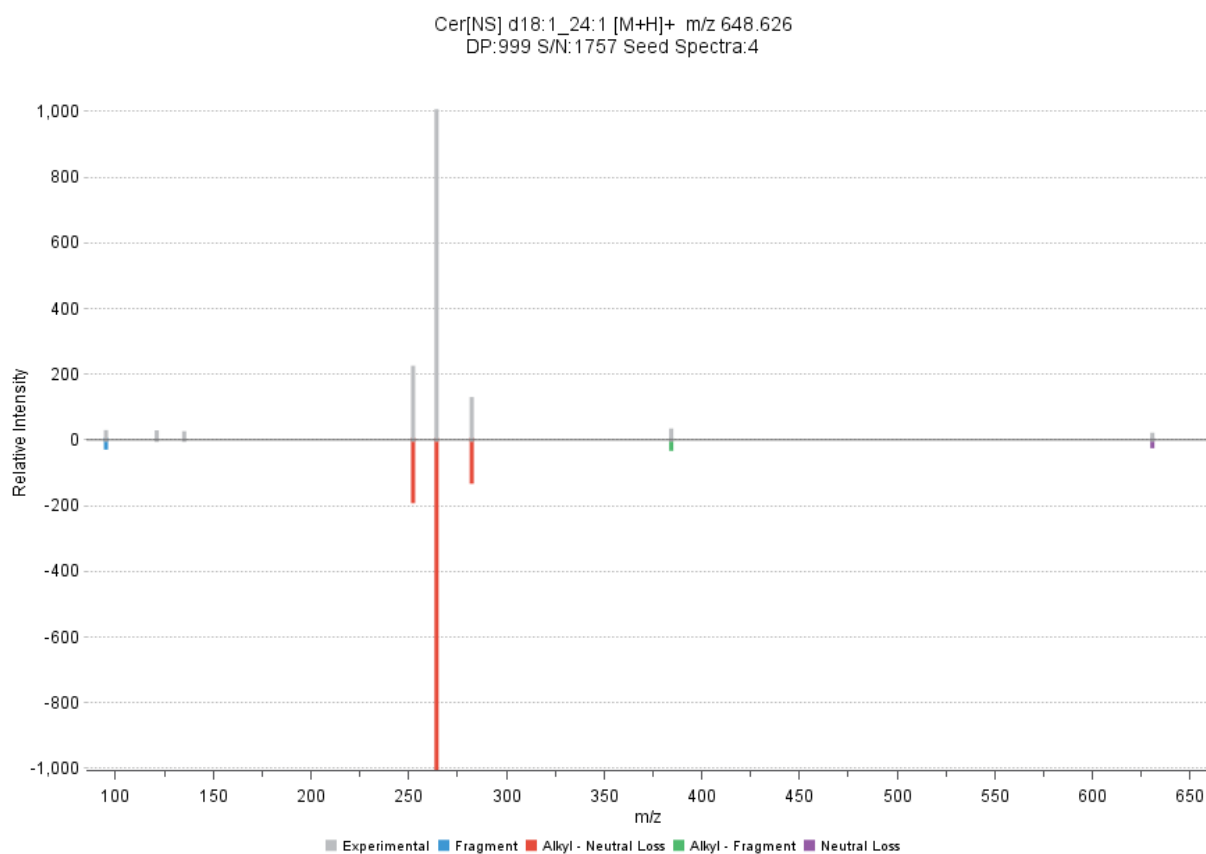

**Supplementary Figure 8:** Representative experimental (grey) and *in silico* (colored) Cer[NS] [M+H]<sup>+</sup> spectra generated from the complex HAP1 extract using the LipiDex HCD Acetate library as the seed library.

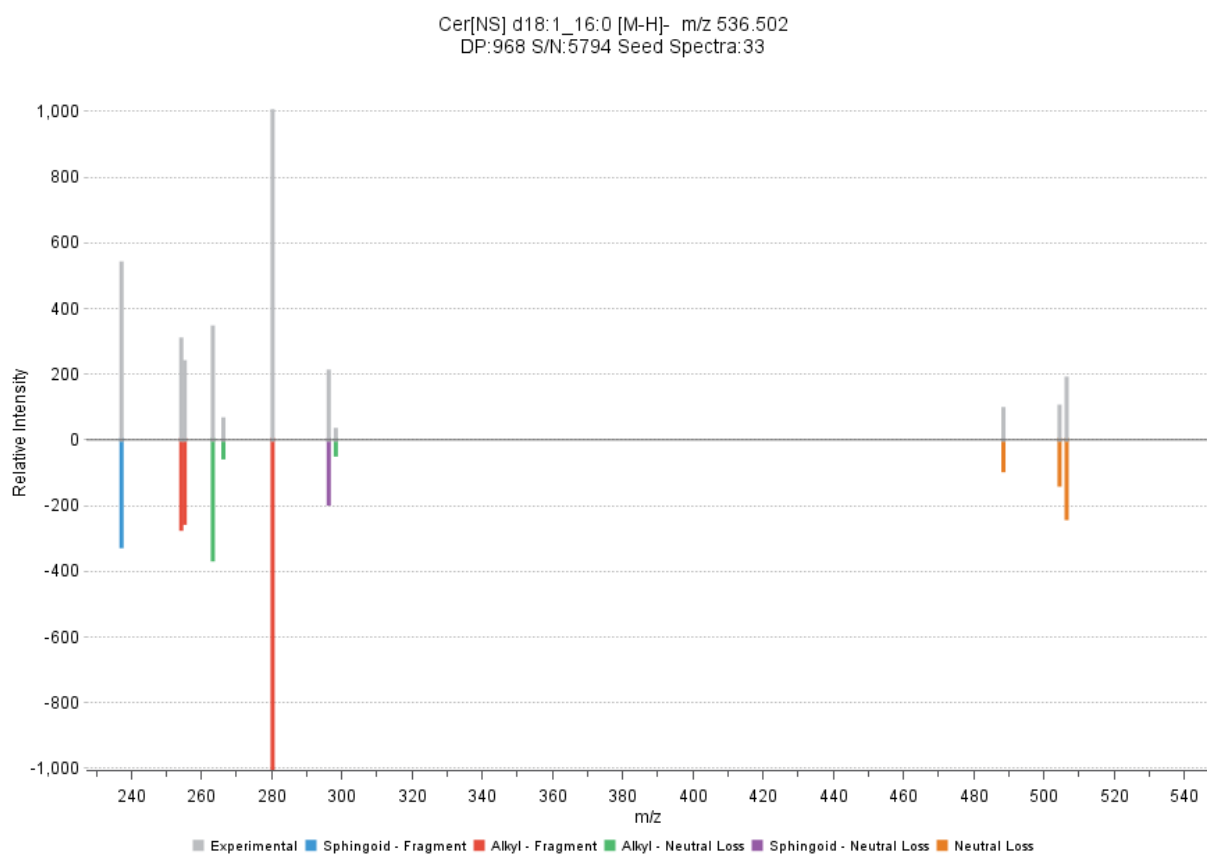

**Supplementary Figure 9:** Representative experimental (grey) and *in silico* (colored) Cer[NS] [M-H]<sup>-</sup> spectra generated from the complex HAP1 extract using the LipiDex HCD Acetate library as the seed library.

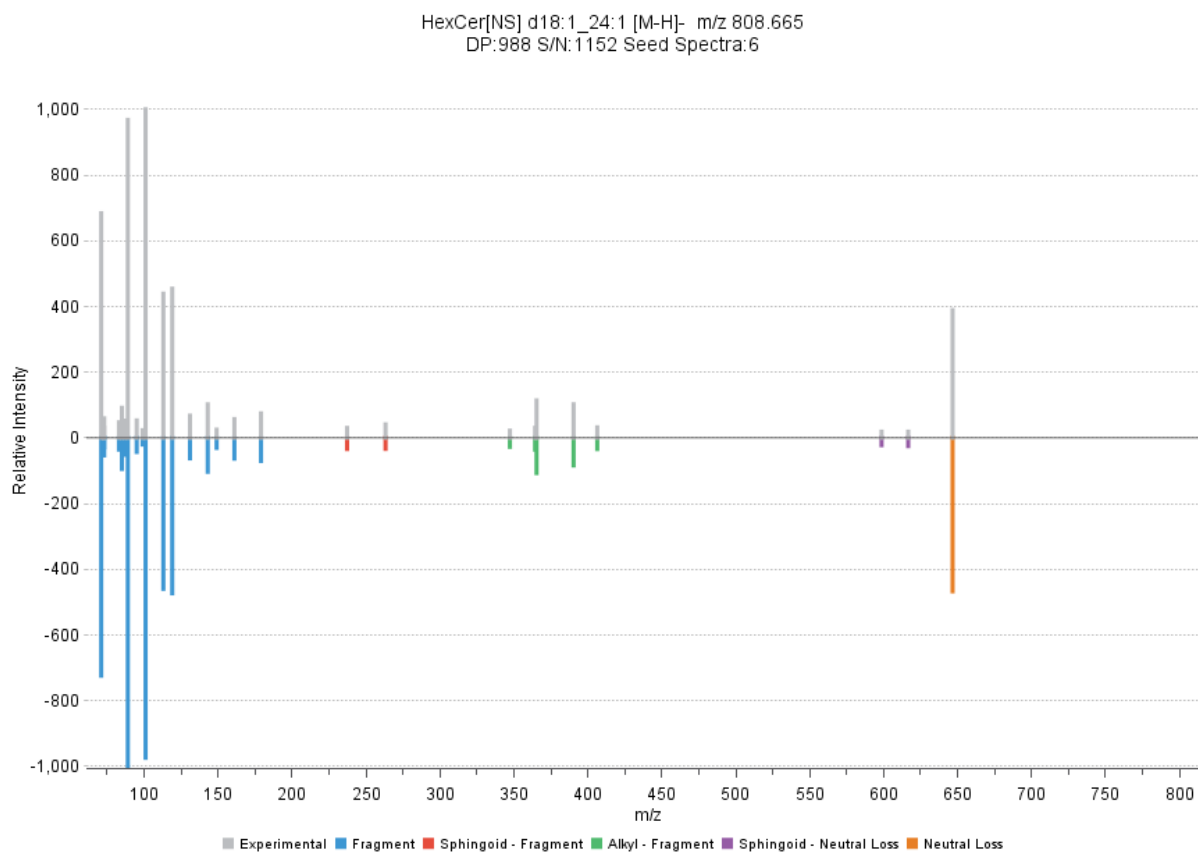

**Supplementary Figure 10:** Representative experimental (grey) and *in silico* (colored) HexCer[NS] [M-H]<sup>-</sup> spectra generated from the complex HAP1 extract using the LipiDex HCD Acetate library as the seed library.

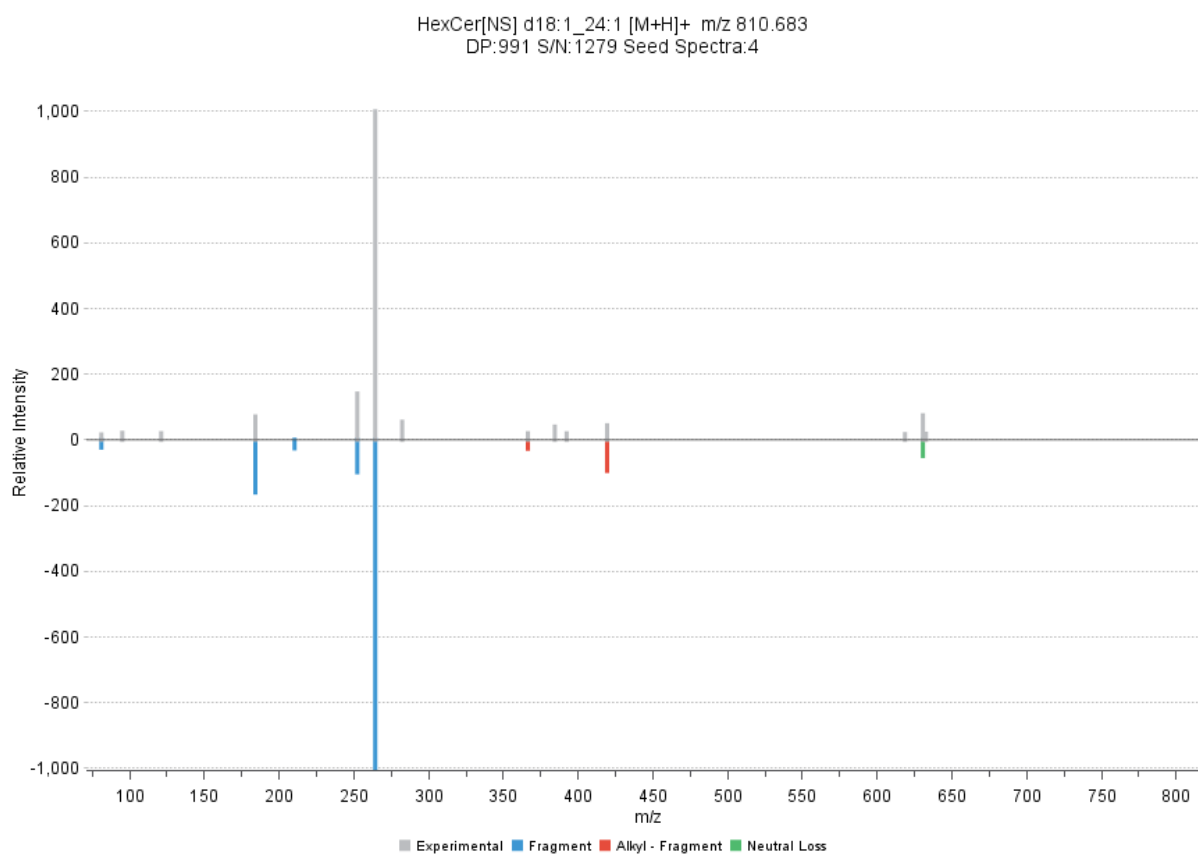

**Supplementary Figure 11:** Representative experimental (grey) and *in silico* (colored) HexCer[NS] [M+H]<sup>+</sup> spectra generated from the complex HAP1 extract using the LipiDex HCD Acetate library as the seed library.

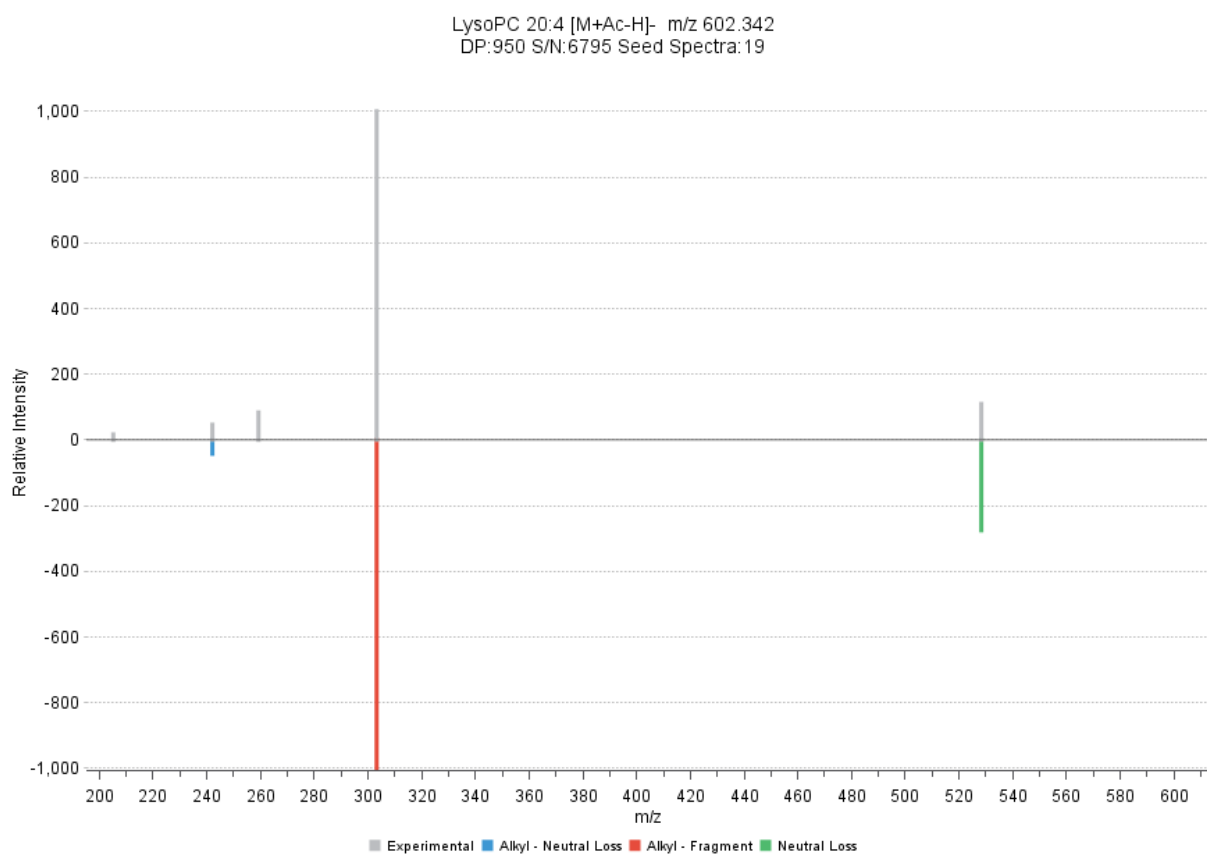

**Supplementary Figure 12:** Representative experimental (grey) and *in silico* (colored) LysoPC [M+Ac-H]<sup>-</sup> spectra generated from the complex HAP1 extract using the LipiDex HCD Acetate library as the seed library.

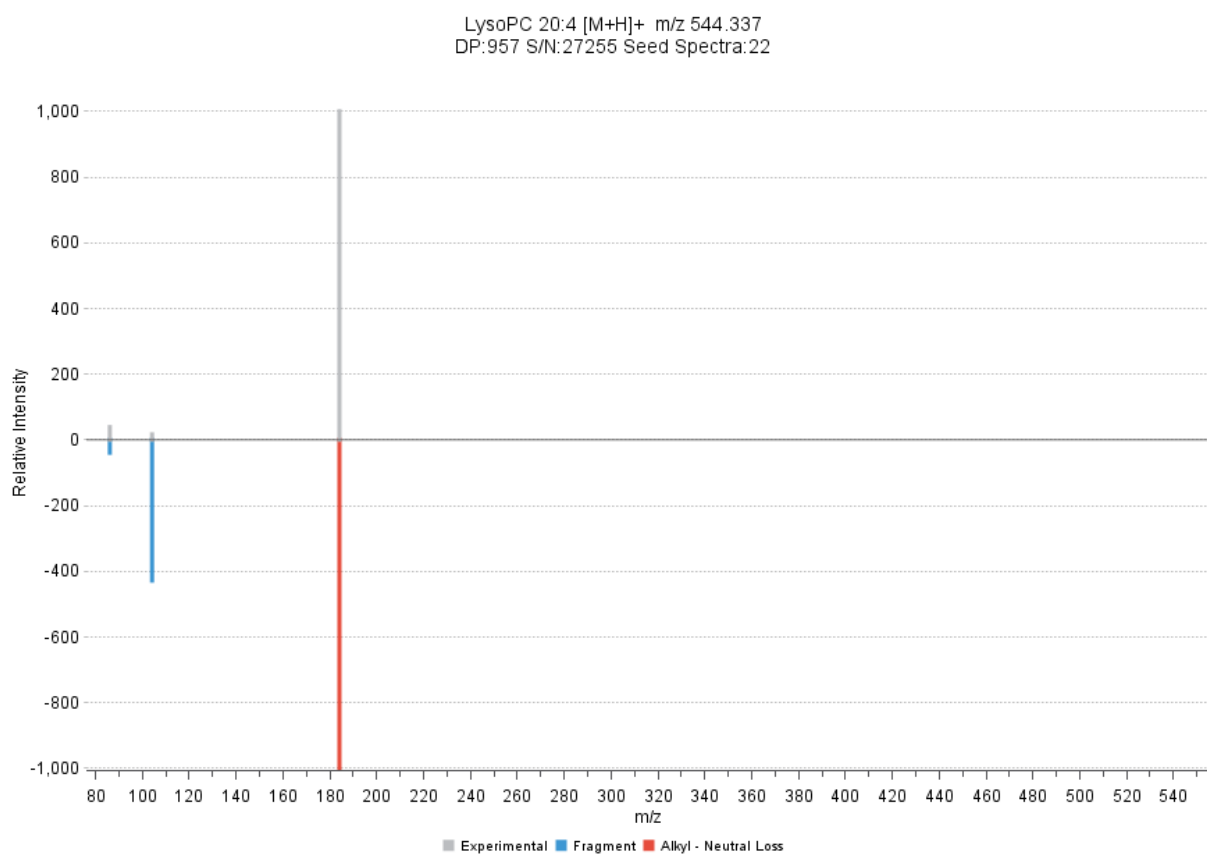

**Supplementary Figure 13:** Representative experimental (grey) and *in silico* (colored) LysoPC [M+H]<sup>+</sup> spectra generated from the complex HAP1 extract using the LipiDex HCD Acetate library as the seed library.

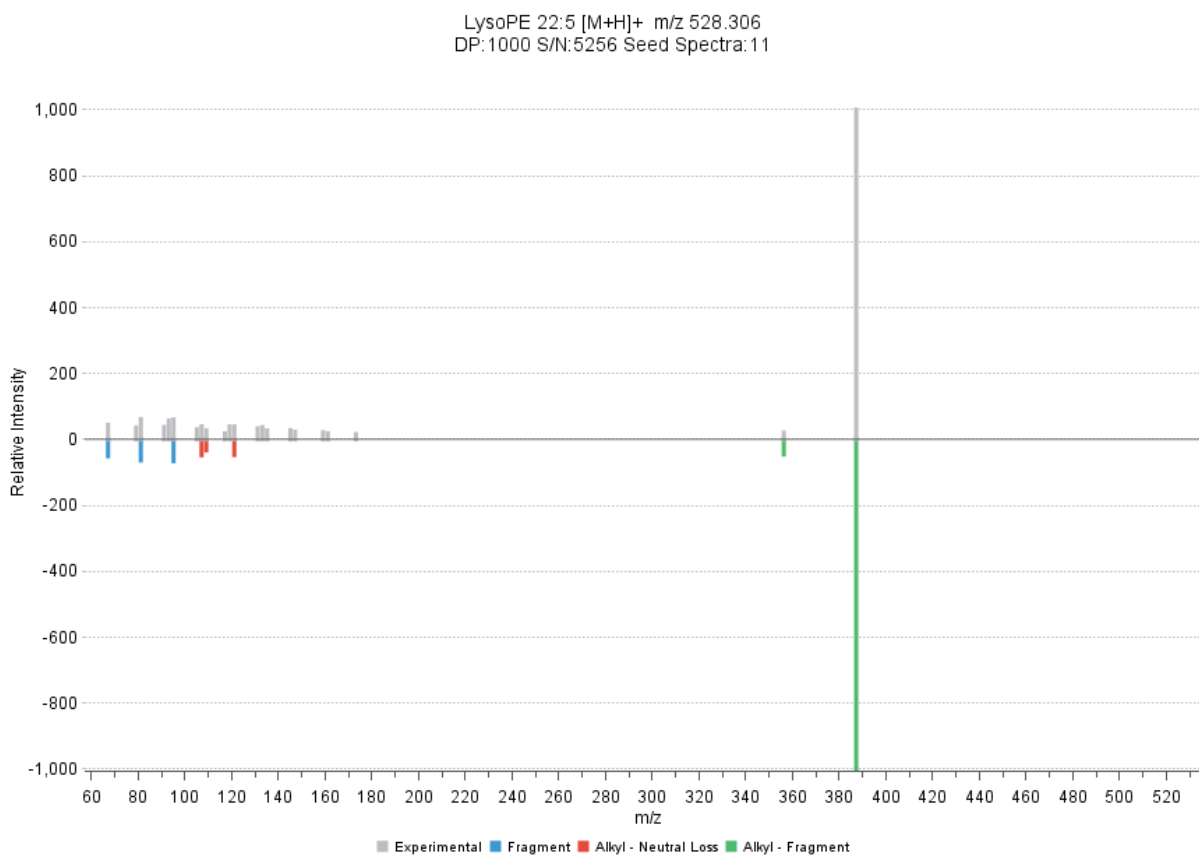

**Supplementary Figure 14:** Representative experimental (grey) and *in silico* (colored) LysoPE [M+H]<sup>+</sup> spectra generated from the complex HAP1 extract using the LipiDex HCD Acetate library as the seed library.

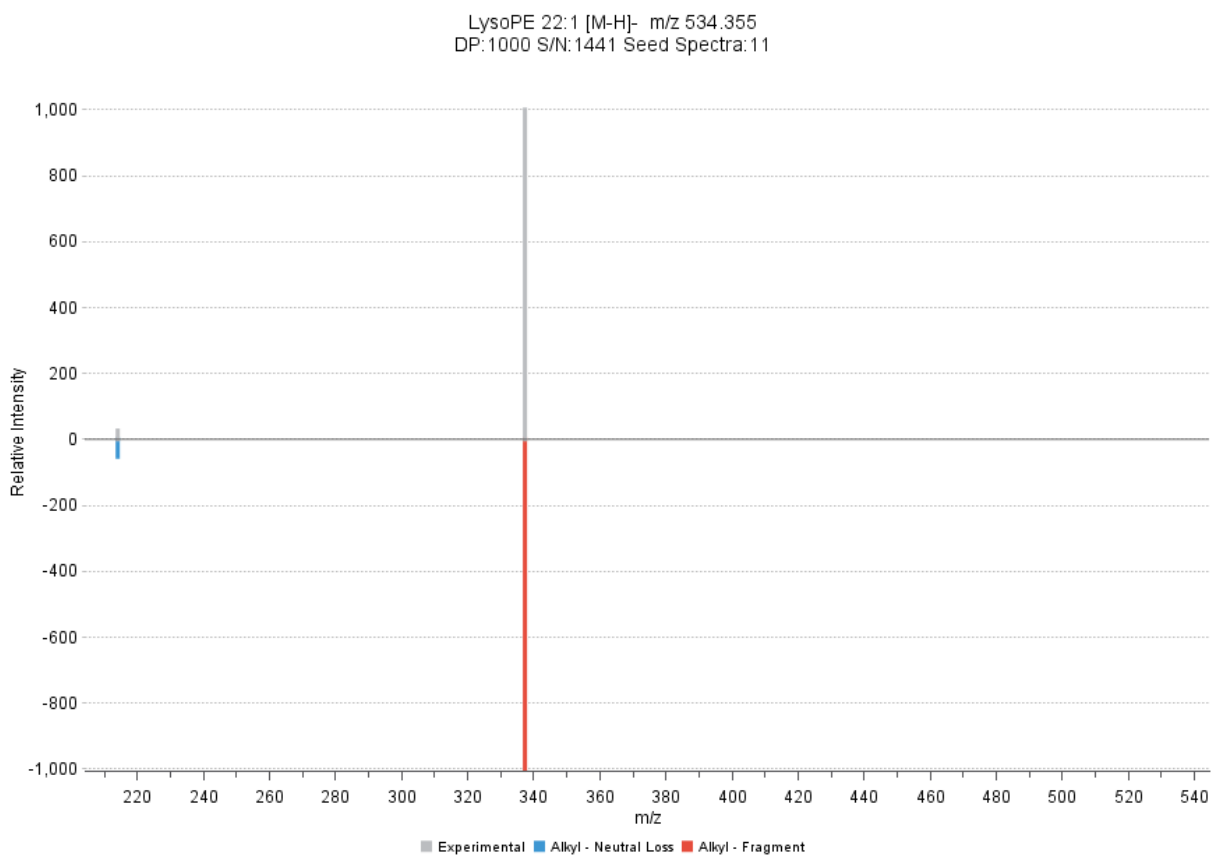

**Supplementary Figure 15:** Representative experimental (grey) and *in silico* (colored) LysoPE [M-H]<sup>-</sup> spectra generated from the complex HAP1 extract using the LipiDex HCD Acetate library as the seed library.

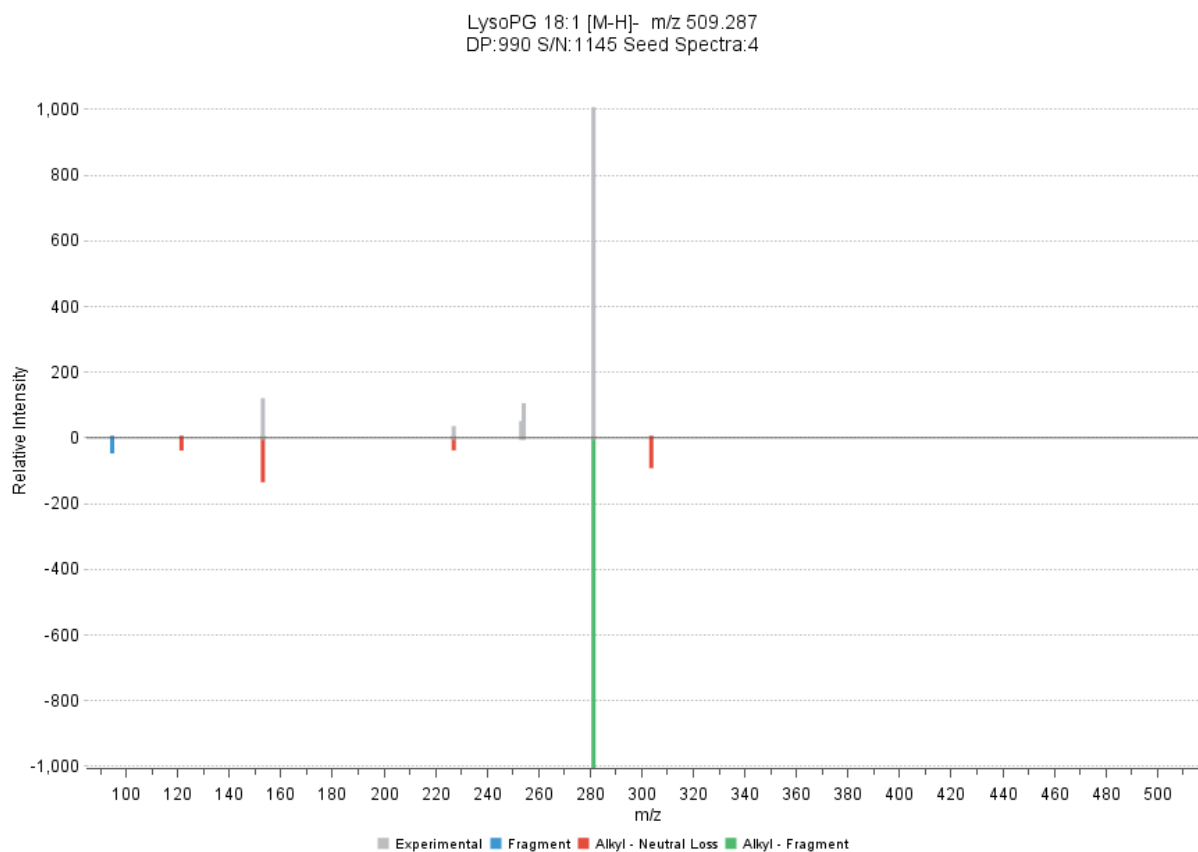

**Supplementary Figure 16:** Representative experimental (grey) and *in silico* (colored) LysoPG [M-H]<sup>-</sup> spectra generated from the complex HAP1 extract using the LipiDex HCD Acetate library as the seed library.

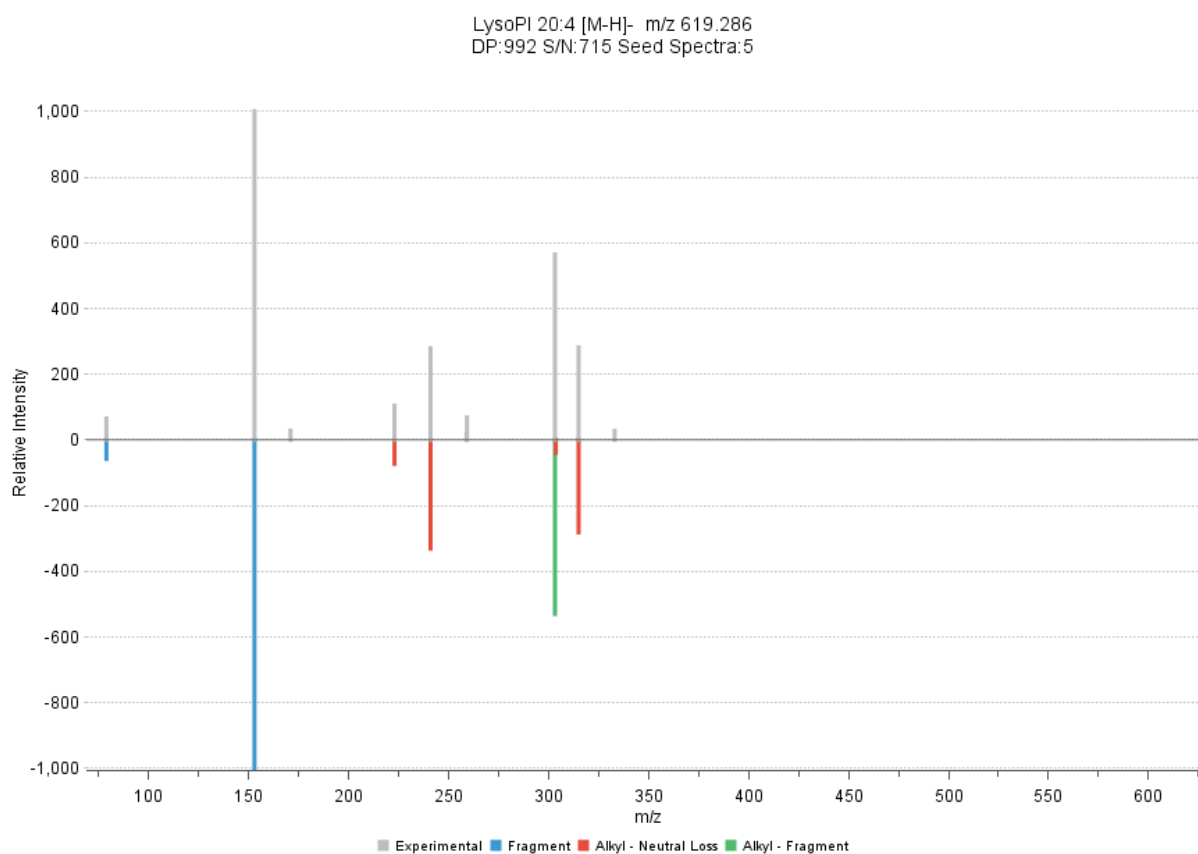

**Supplementary Figure 17:** Representative experimental (grey) and *in silico* (colored) LysoPI [M-H]<sup>-</sup> spectra generated from the complex HAP1 extract using the LipiDex HCD Acetate library as the seed library.

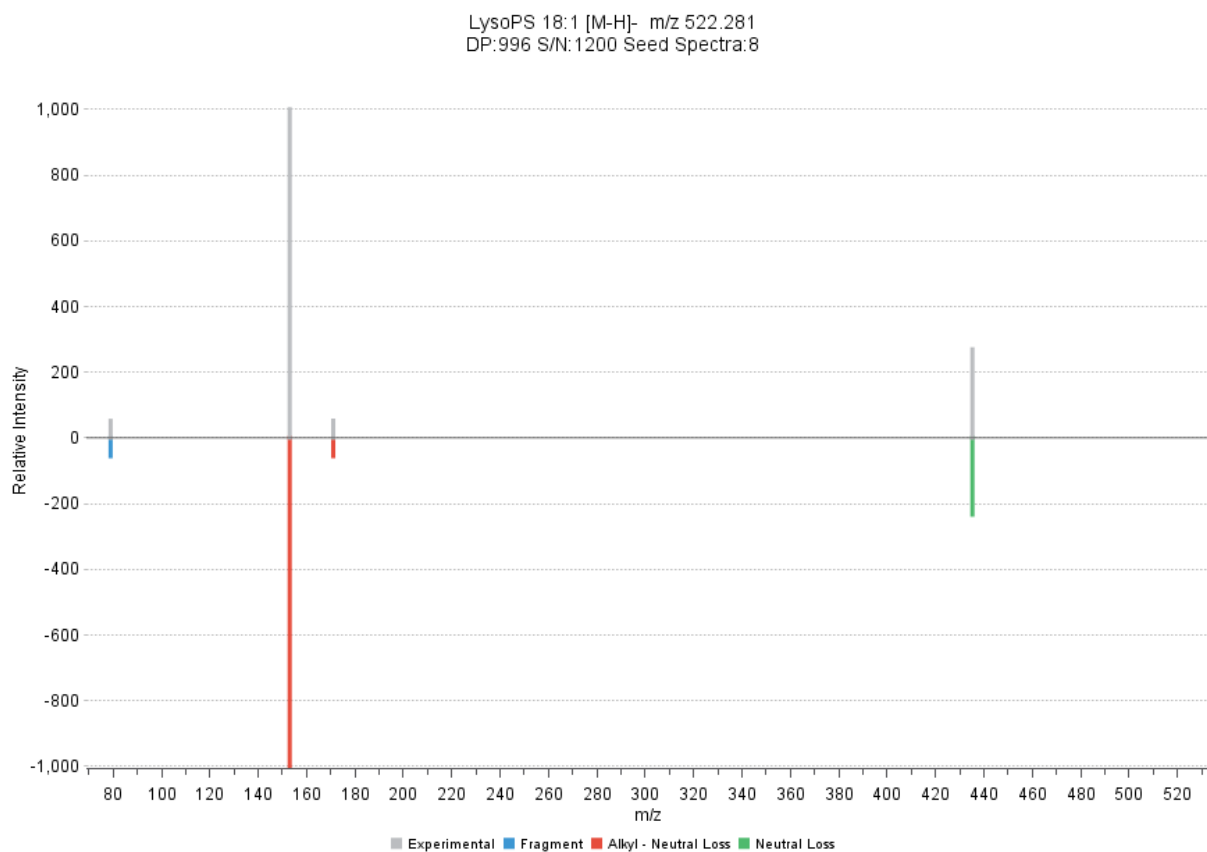

**Supplementary Figure 18:** Representative experimental (grey) and *in silico* (colored) LysoPS [M-H]<sup>-</sup> spectra generated from the complex HAP1 extract using the LipiDex HCD Acetate library as the seed library.

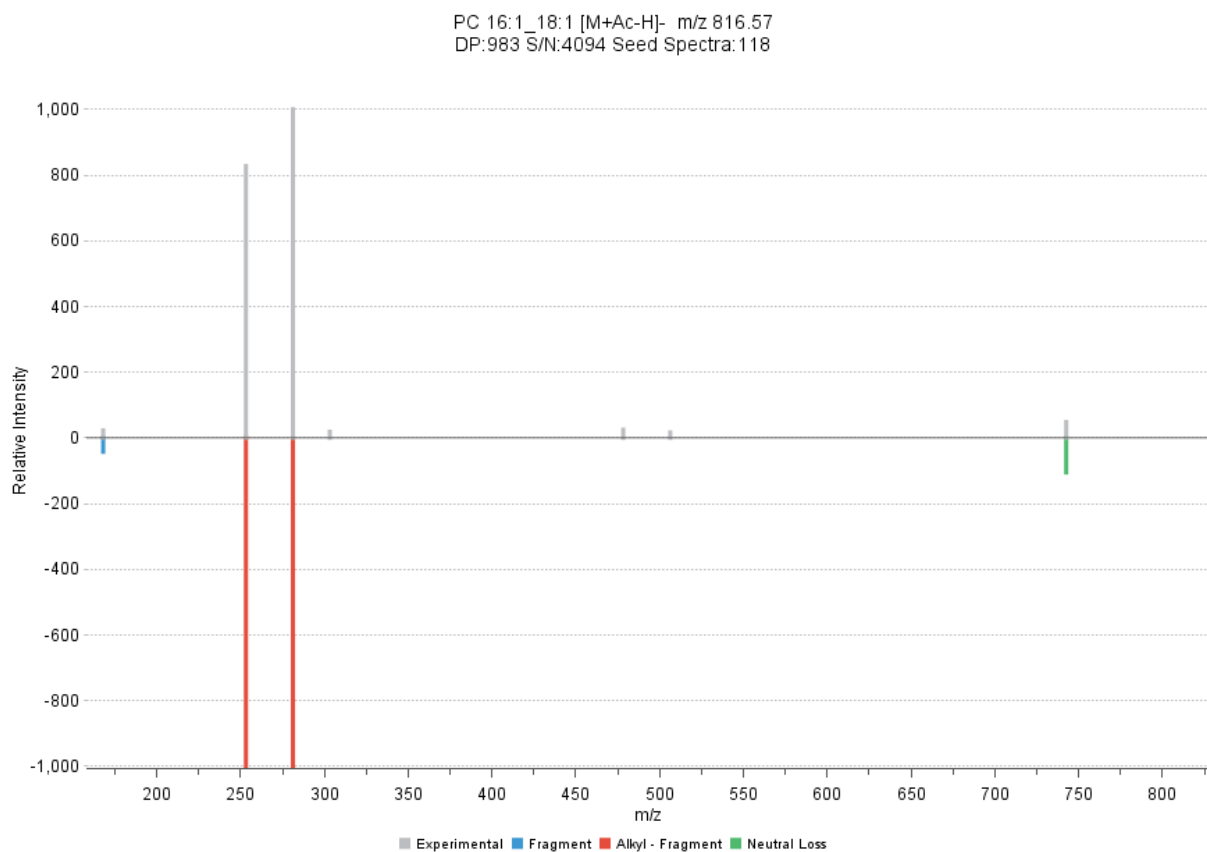

**Supplementary Figure 19:** Representative experimental (grey) and *in silico* (colored) PC [M+Ac-H]<sup>-</sup> spectra generated from the complex HAP1 extract using the LipiDex HCD Acetate library as the seed library.

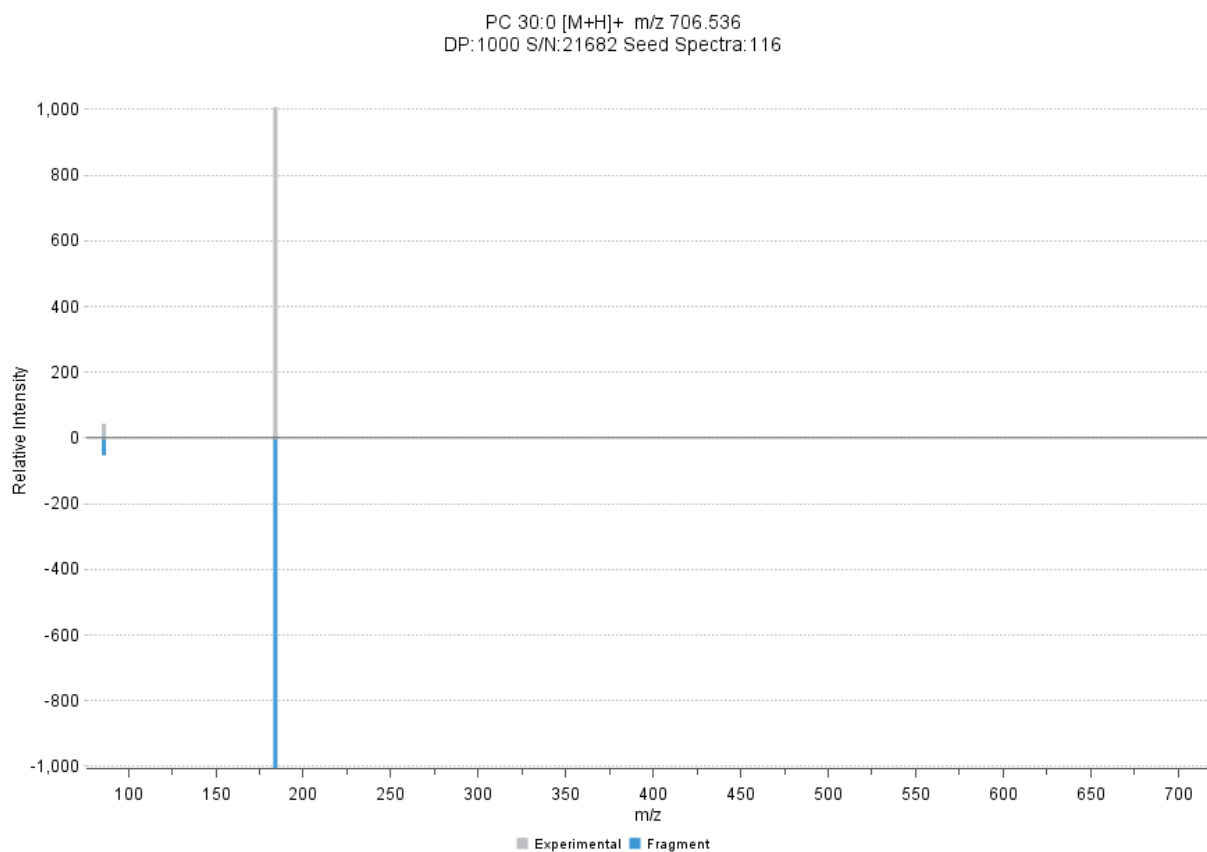

**Supplementary Figure 20:** Representative experimental (grey) and *in silico* (colored) PC [M+H]<sup>+</sup> spectra generated from the complex HAP1 extract using the LipiDex HCD Acetate library as the seed library.

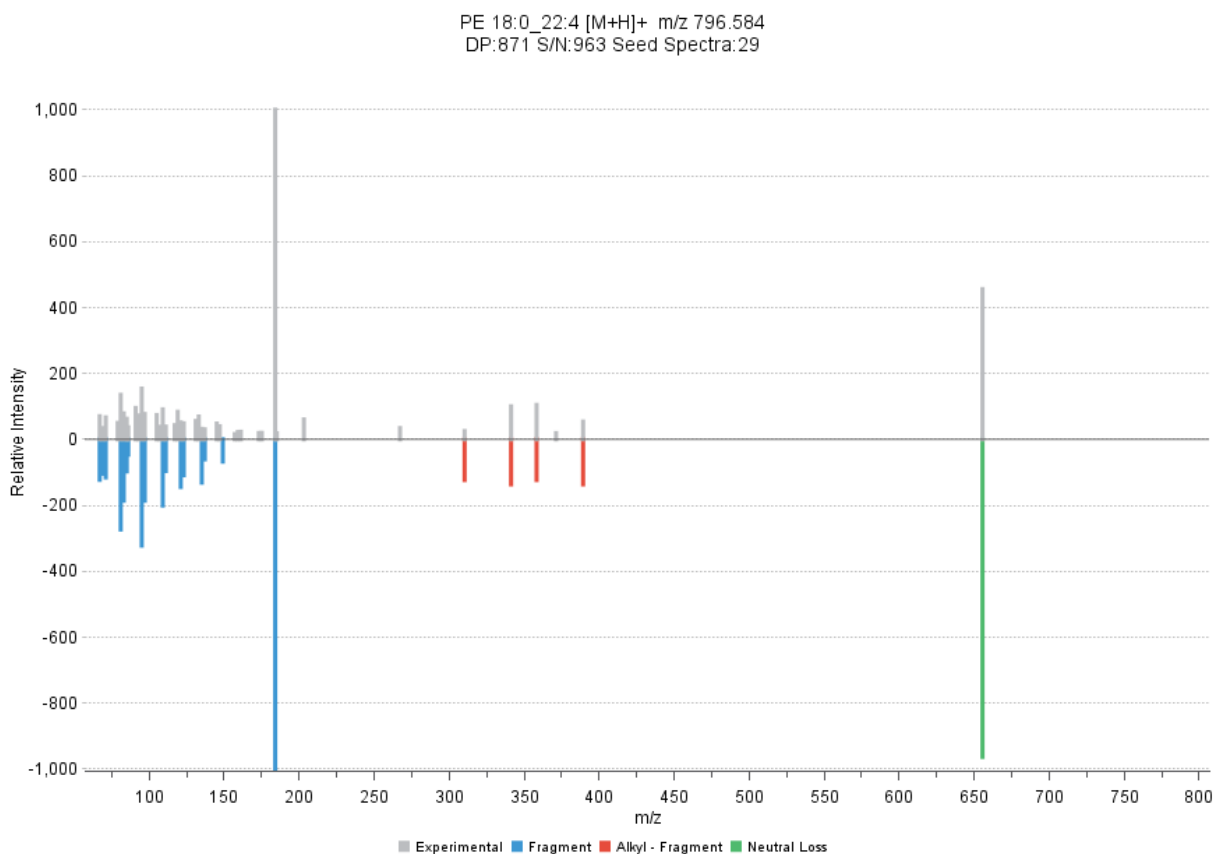

**Supplementary Figure 21:** Representative experimental (grey) and *in silico* (colored) PE [M+H]<sup>+</sup> spectra generated from the complex HAP1 extract using the LipiDex HCD Acetate library as the seed library. Note: the presence of an annotated peak at *m/z* 184 is due to the prevalent co-fragmentation of PE and PC species.

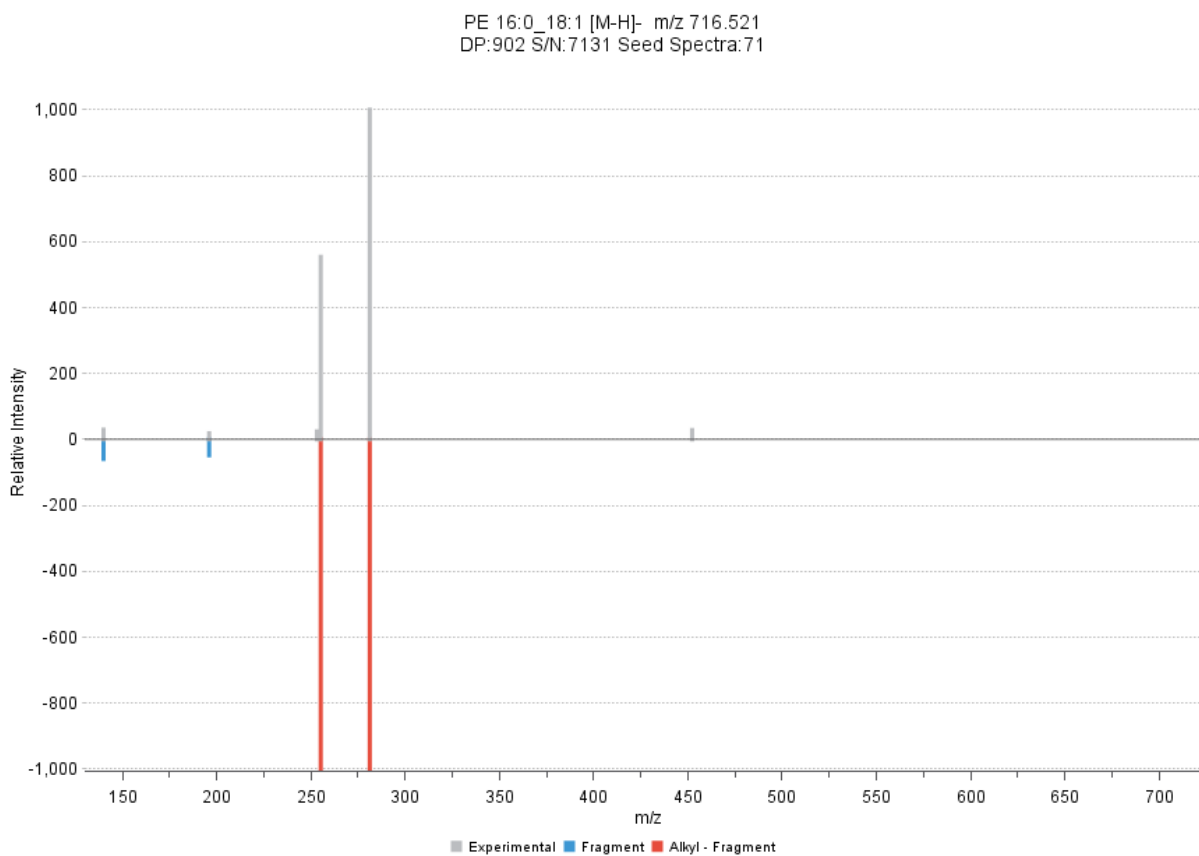

**Supplementary Figure 22:** Representative experimental (grey) and *in silico* (colored) PE [M-H]<sup>-</sup> spectra generated from the complex HAP1 extract using the LipiDex HCD Acetate library as the seed library.

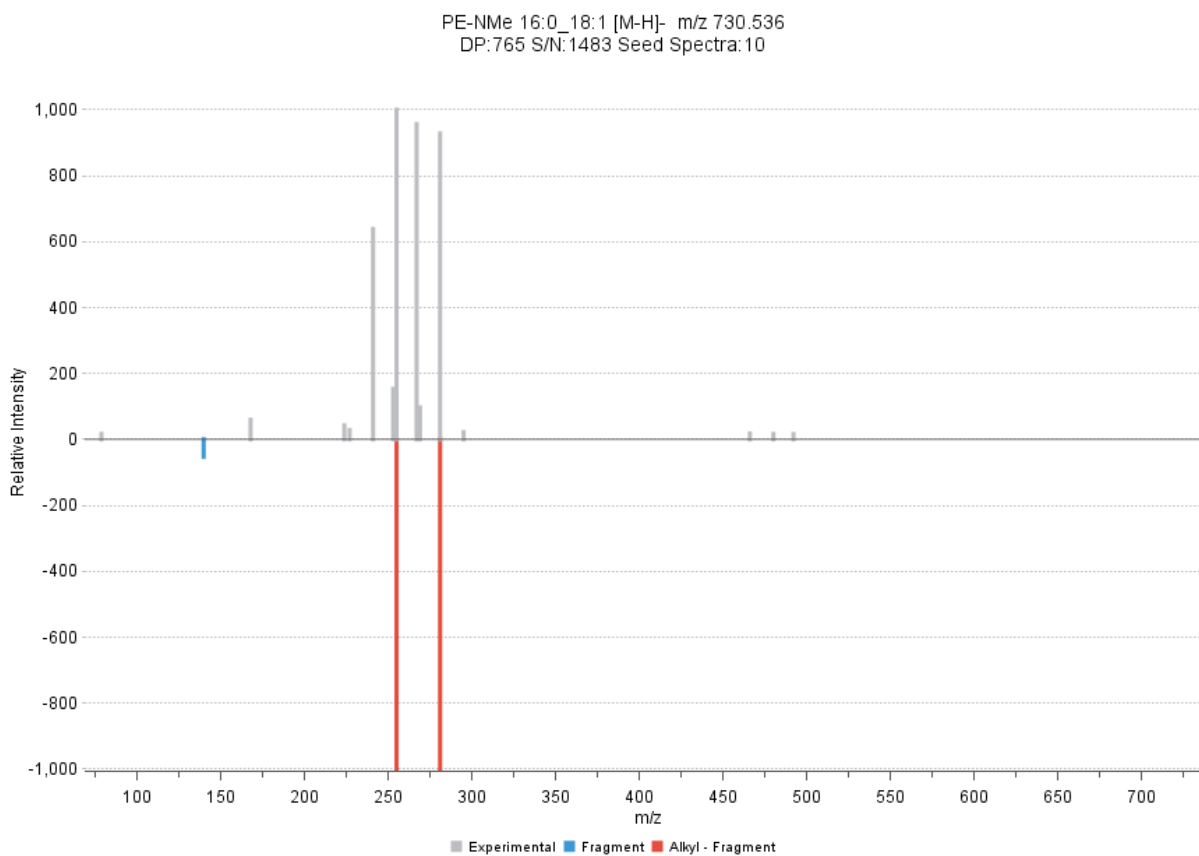

**Supplementary Figure 23:** Representative experimental (grey) and *in silico* (colored) PE-NMe [M-H]<sup>-</sup> spectra generated from the complex HAP1 extract using the LipiDex HCD Acetate library as the seed library.

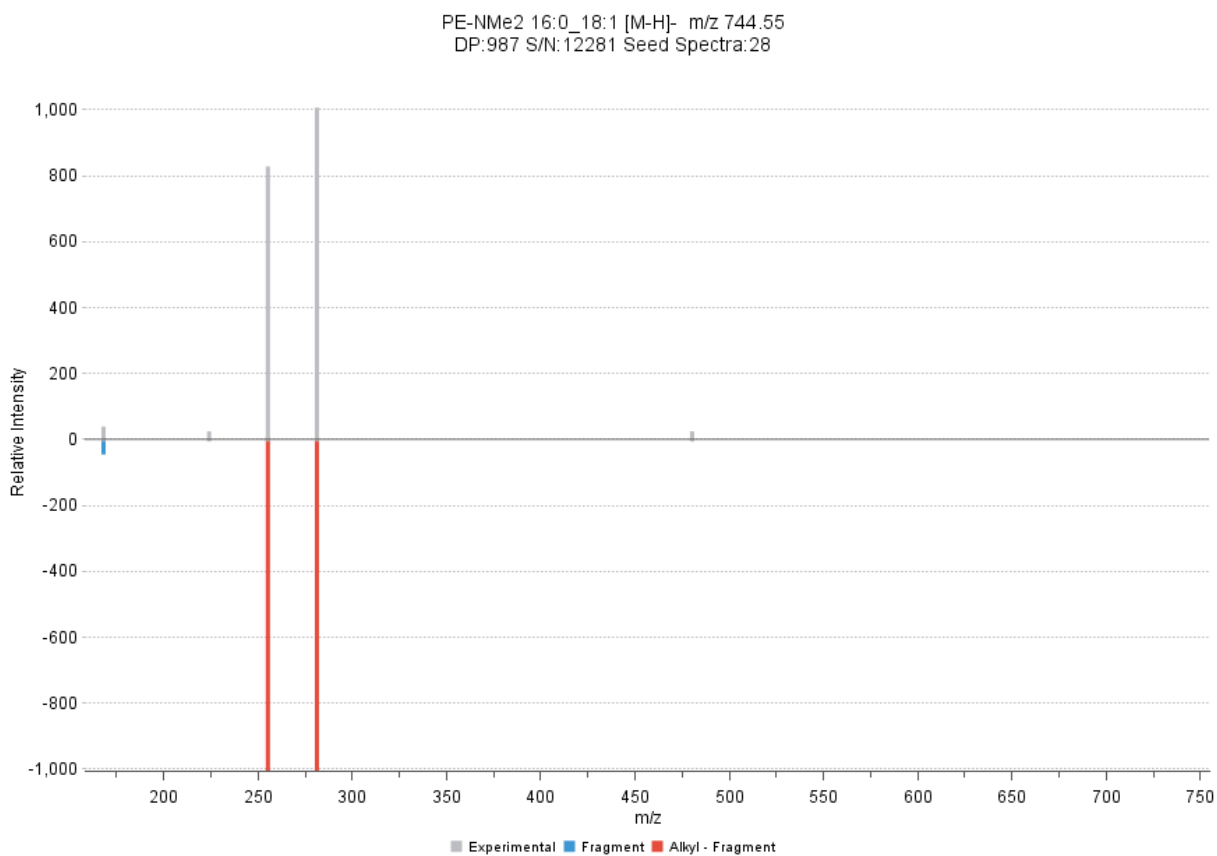

**Supplementary Figure 24:** Representative experimental (grey) and *in silico* (colored) PE-NMe2 [M-H]<sup>-</sup> spectra generated from the complex HAP1 extract using the LipiDex HCD Acetate library as the seed library.

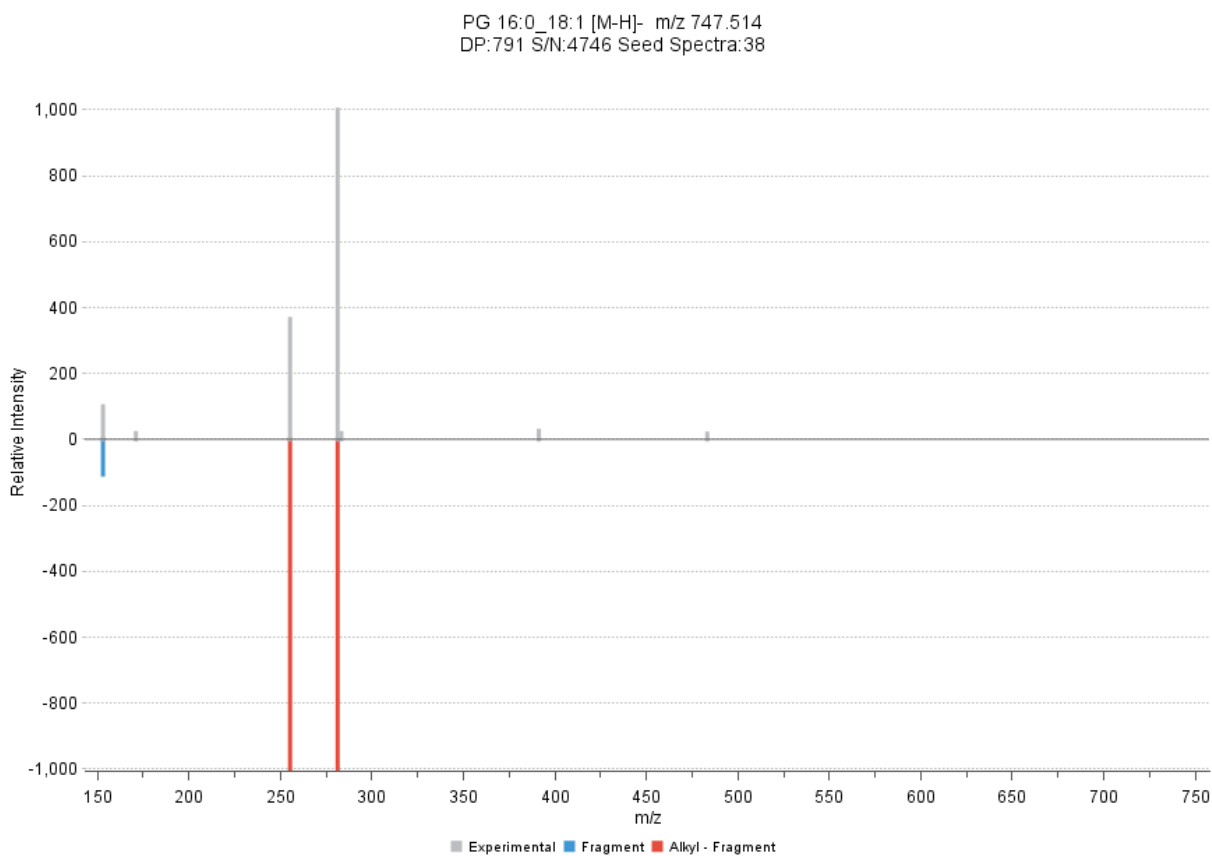

**Supplementary Figure 25:** Representative experimental (grey) and *in silico* (colored) PG [M-H]<sup>-</sup> spectra generated from the complex HAP1 extract using the LipiDex HCD Acetate library as the seed library.

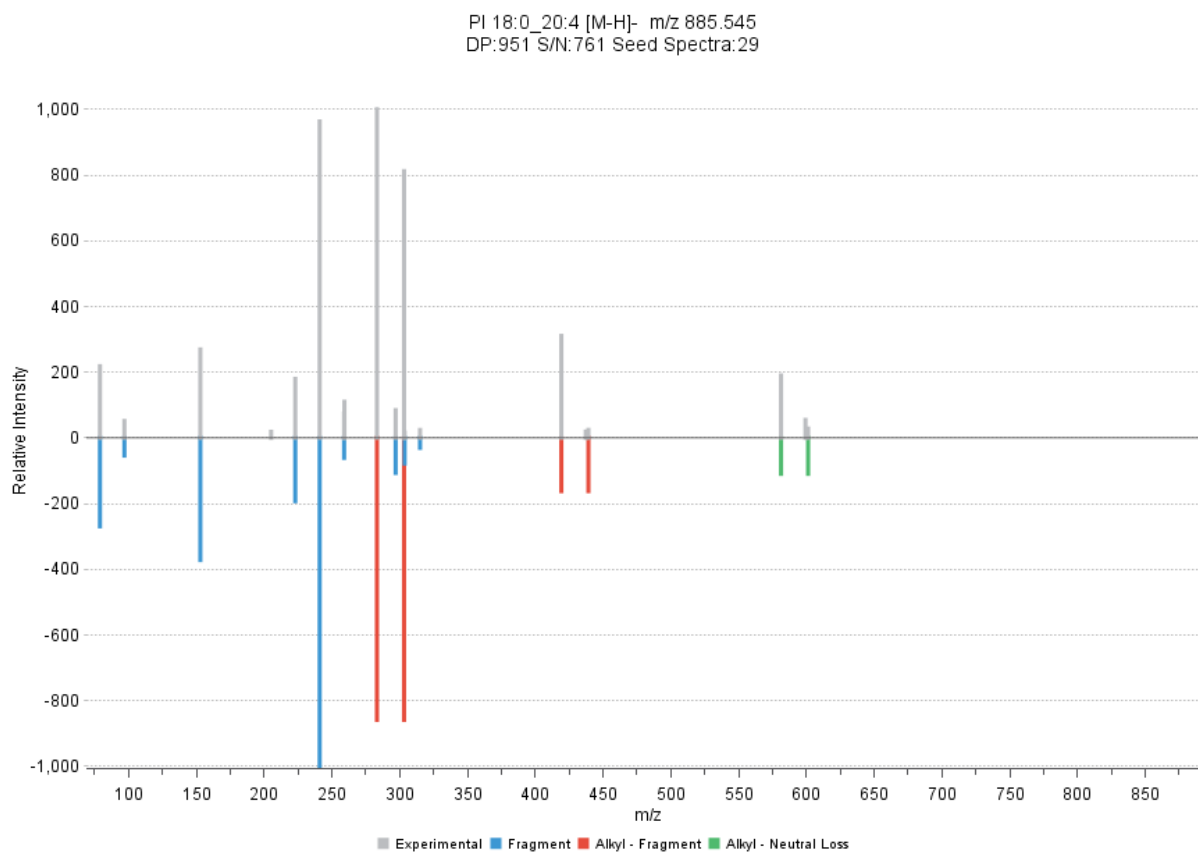

**Supplementary Figure 26:** Representative experimental (grey) and *in silico* (colored) PI [M-H]<sup>-</sup> spectra generated from the complex HAP1 extract using the LipiDex HCD Acetate library as the seed library.

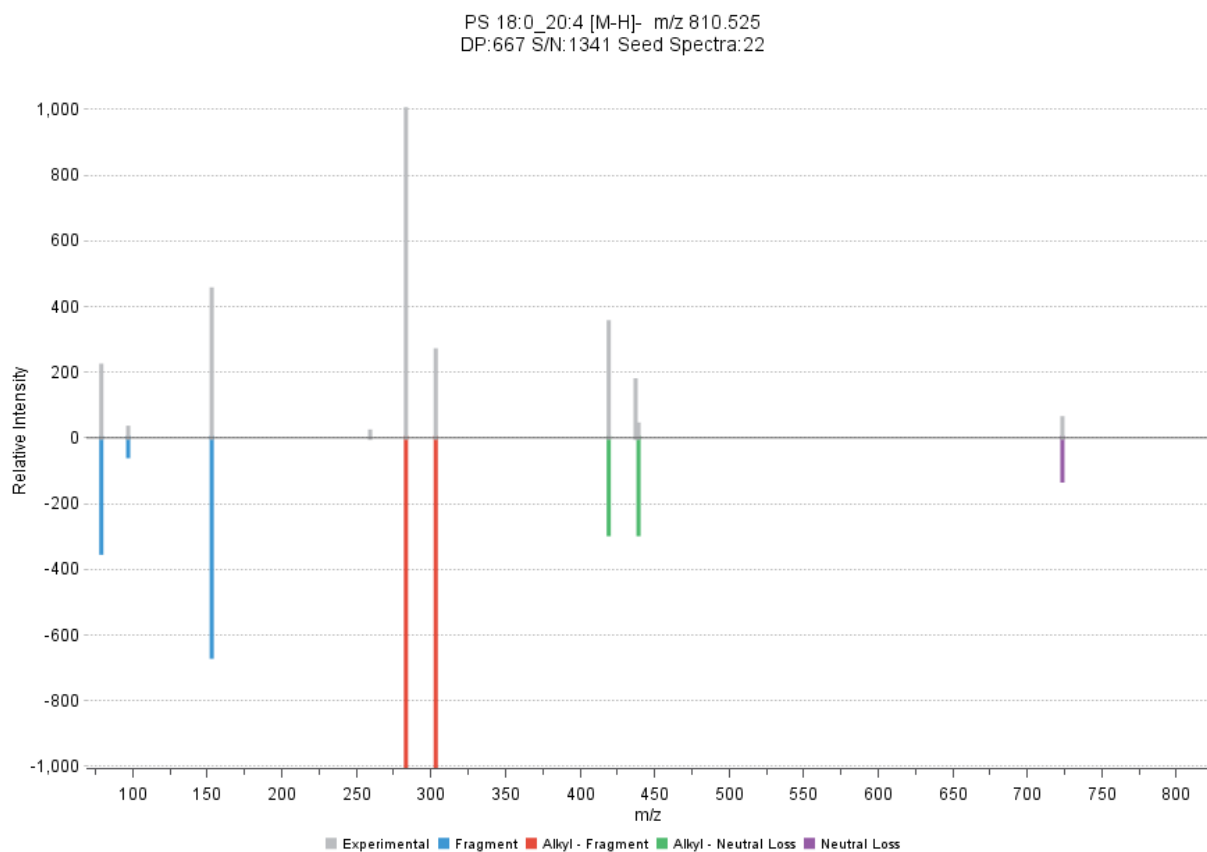

**Supplementary Figure 27:** Representative experimental (grey) and *in silico* (colored) PS [M-H]<sup>-</sup> spectra generated from the complex HAP1 extract using the LipiDex HCD Acetate library as the seed library.

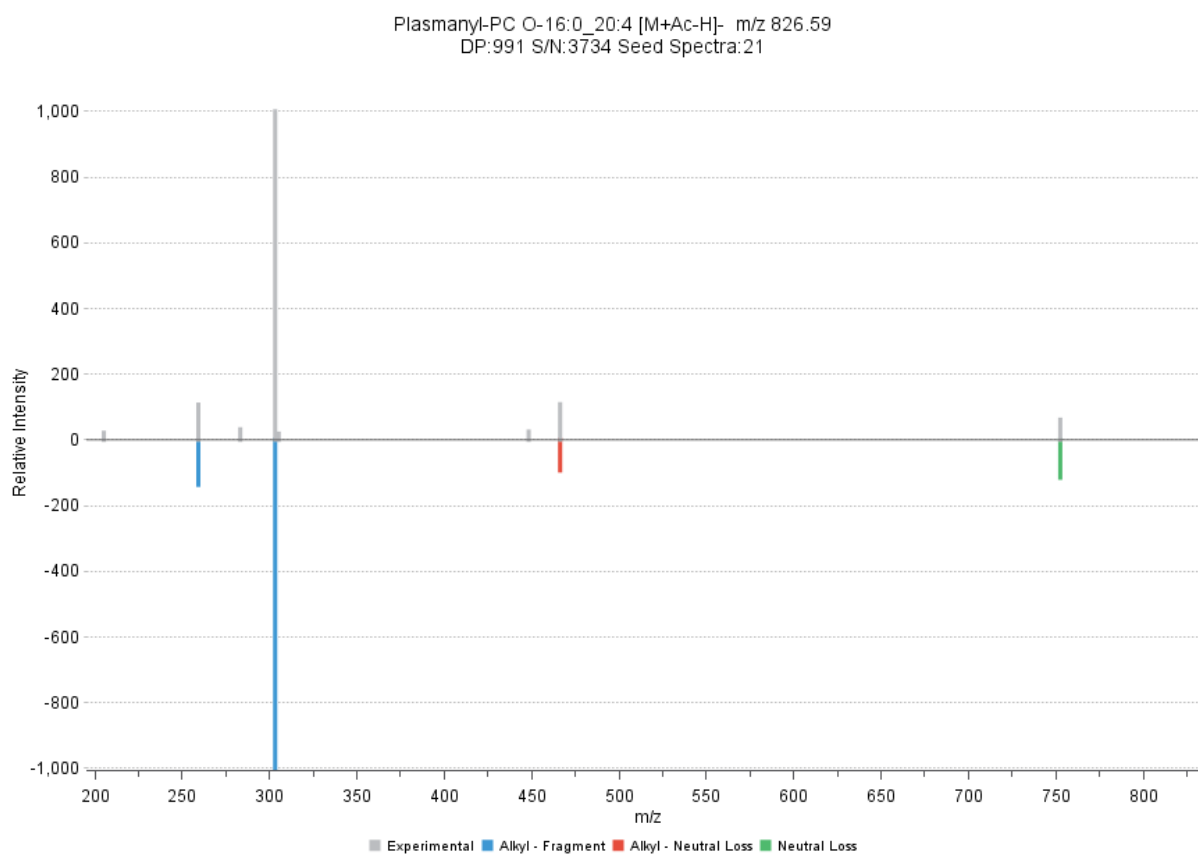

**Supplementary Figure 28:** Representative experimental (grey) and *in silico* (colored) Plasmany-PC [M+Ac-H]<sup>-</sup> spectra generated from the complex HAP1 extract using the LipiDex HCD Acetate library as the seed library.

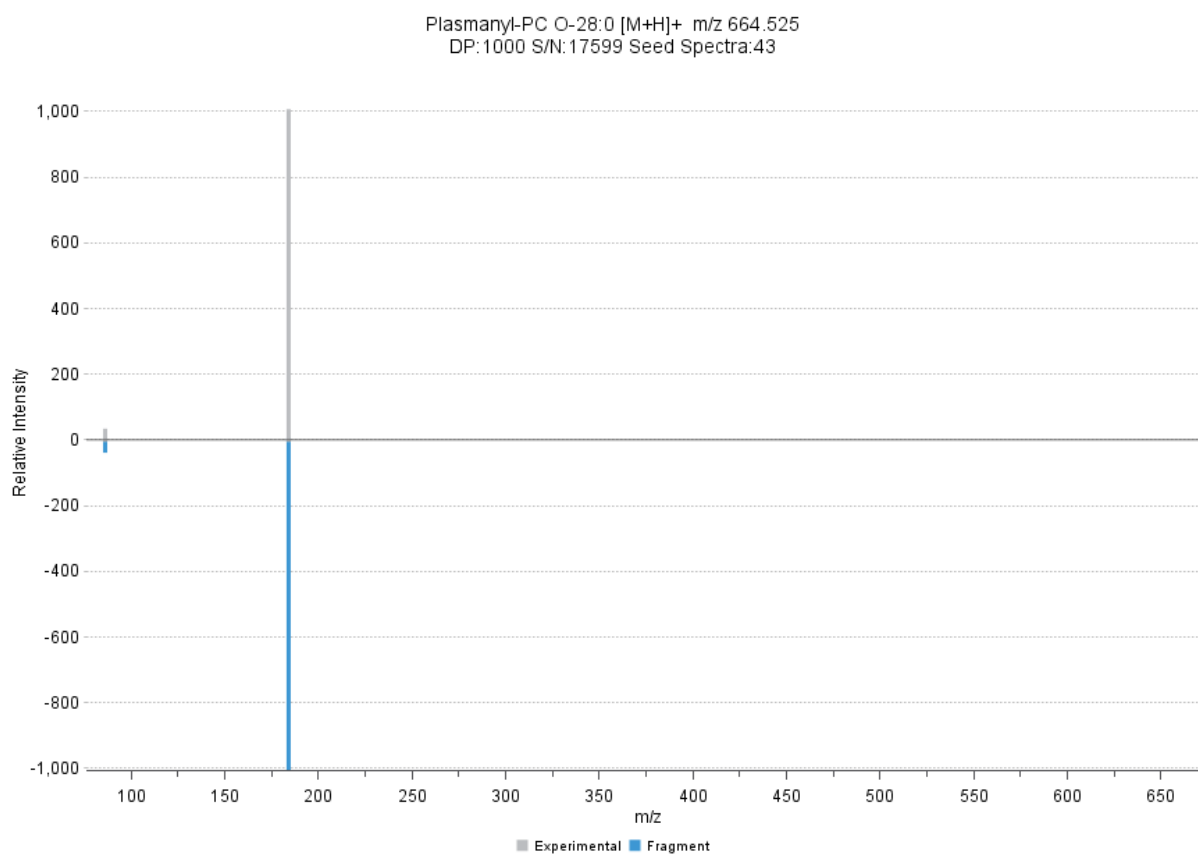

**Supplementary Figure 29:** Representative experimental (grey) and *in silico* (colored) Plasmany-PC [M+H]<sup>+</sup> spectra generated from the complex HAP1 extract using the LipiDex HCD Acetate library as the seed library.

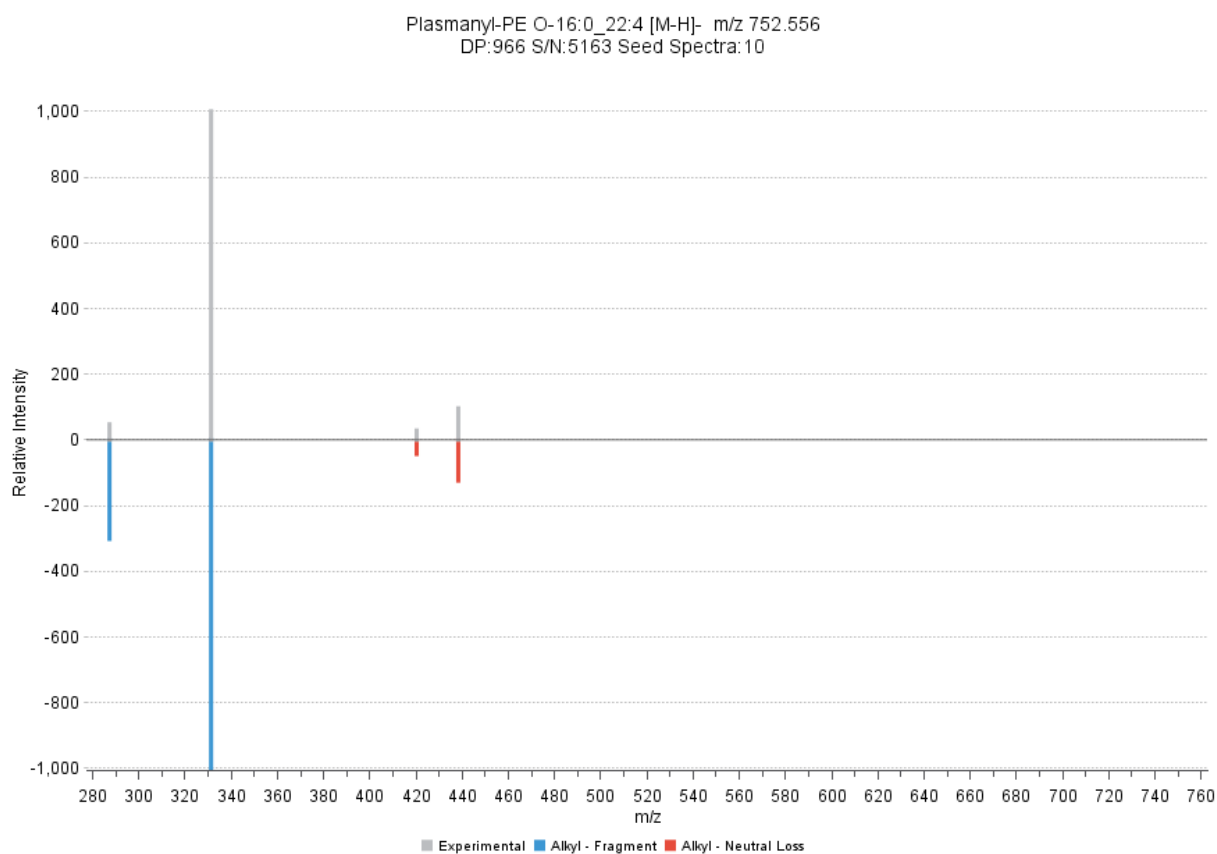

**Supplementary Figure 30:** Representative experimental (grey) and *in silico* (colored) Plasmanyln-PE [M-H]<sup>-</sup> spectra generated from the complex HAP1 extract using the LipiDex HCD Acetate library as the seed library.

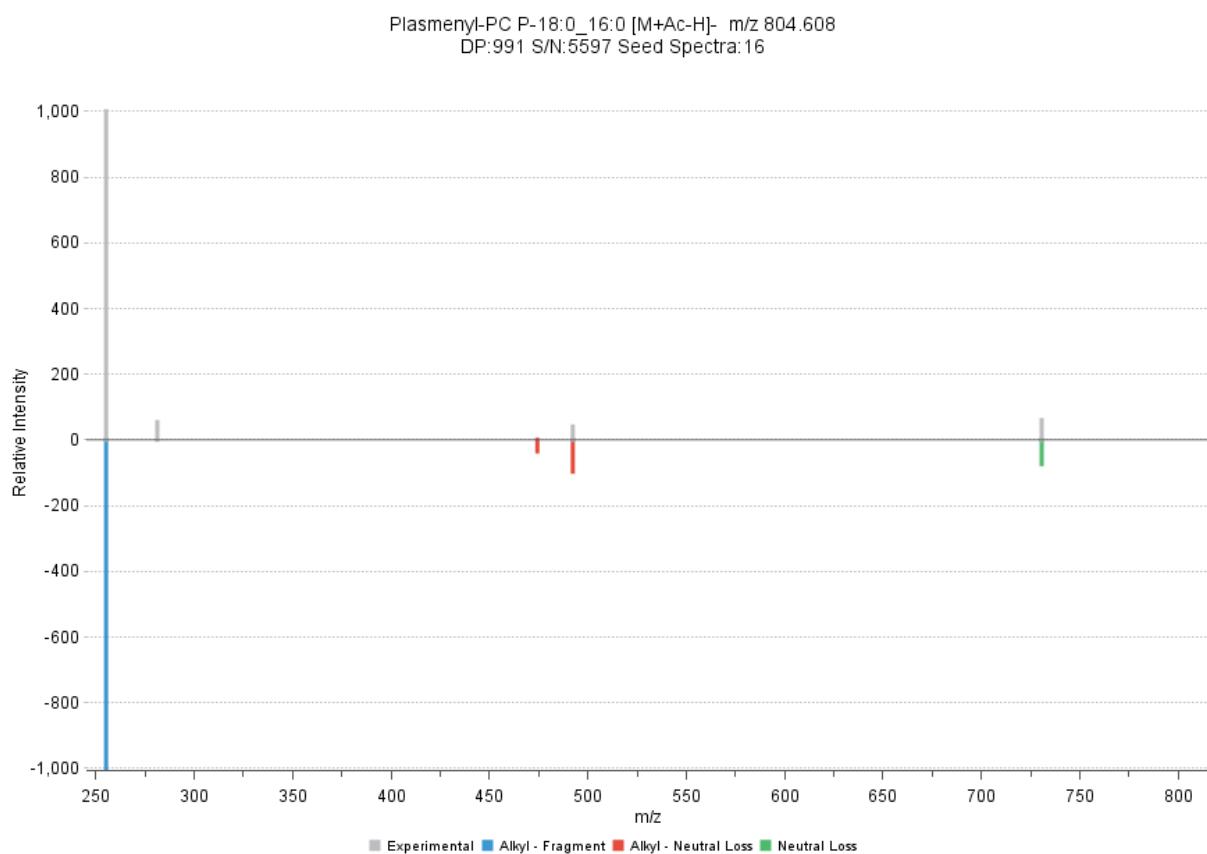

**Supplementary Figure 31:** Representative experimental (grey) and *in silico* (colored) Plasmenyl-PC [M+Ac-H]<sup>-</sup> spectra generated from the complex HAP1 extract using the LipiDex HCD Acetate library as the seed library.

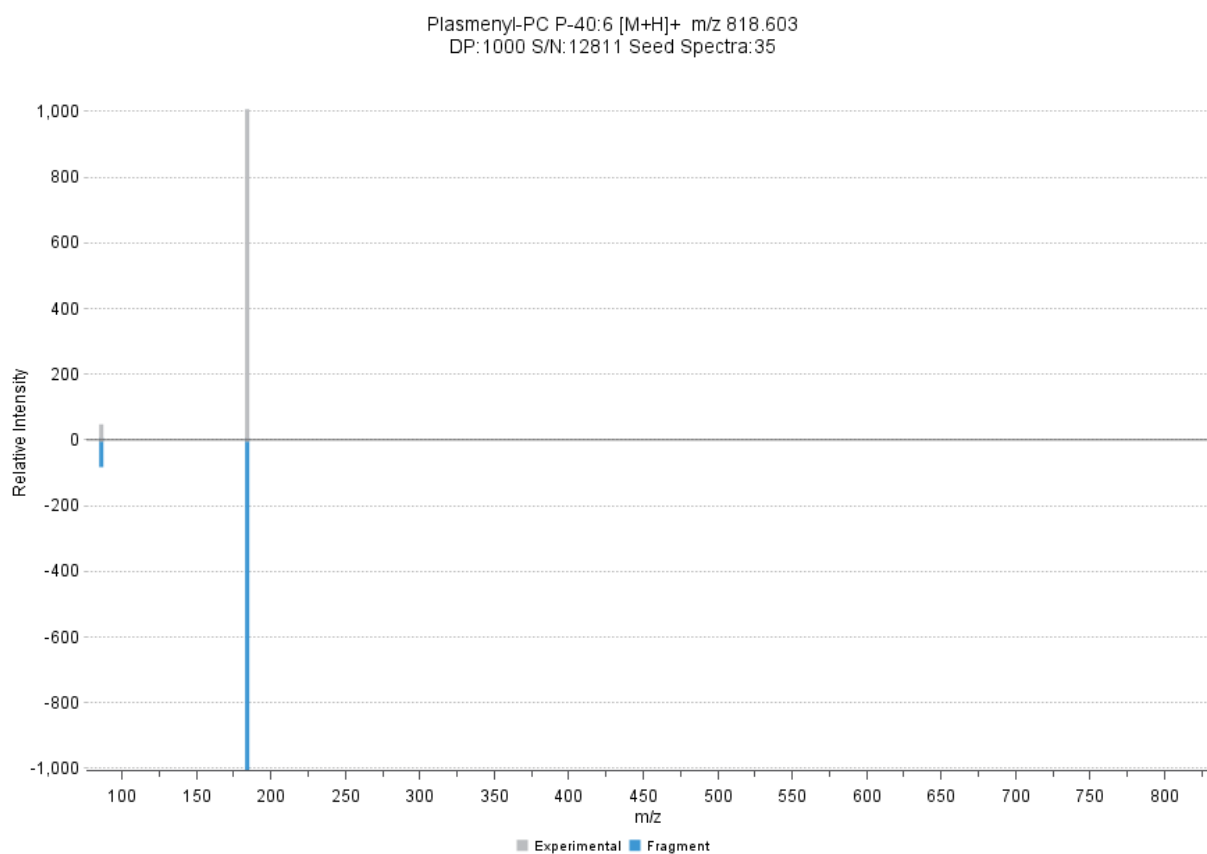

**Supplementary Figure 32:** Representative experimental (grey) and *in silico* (colored) Plasmenyl-PC [M+H]<sup>+</sup> spectra generated from the complex HAP1 extract using the LipiDex HCD Acetate library as the seed library.

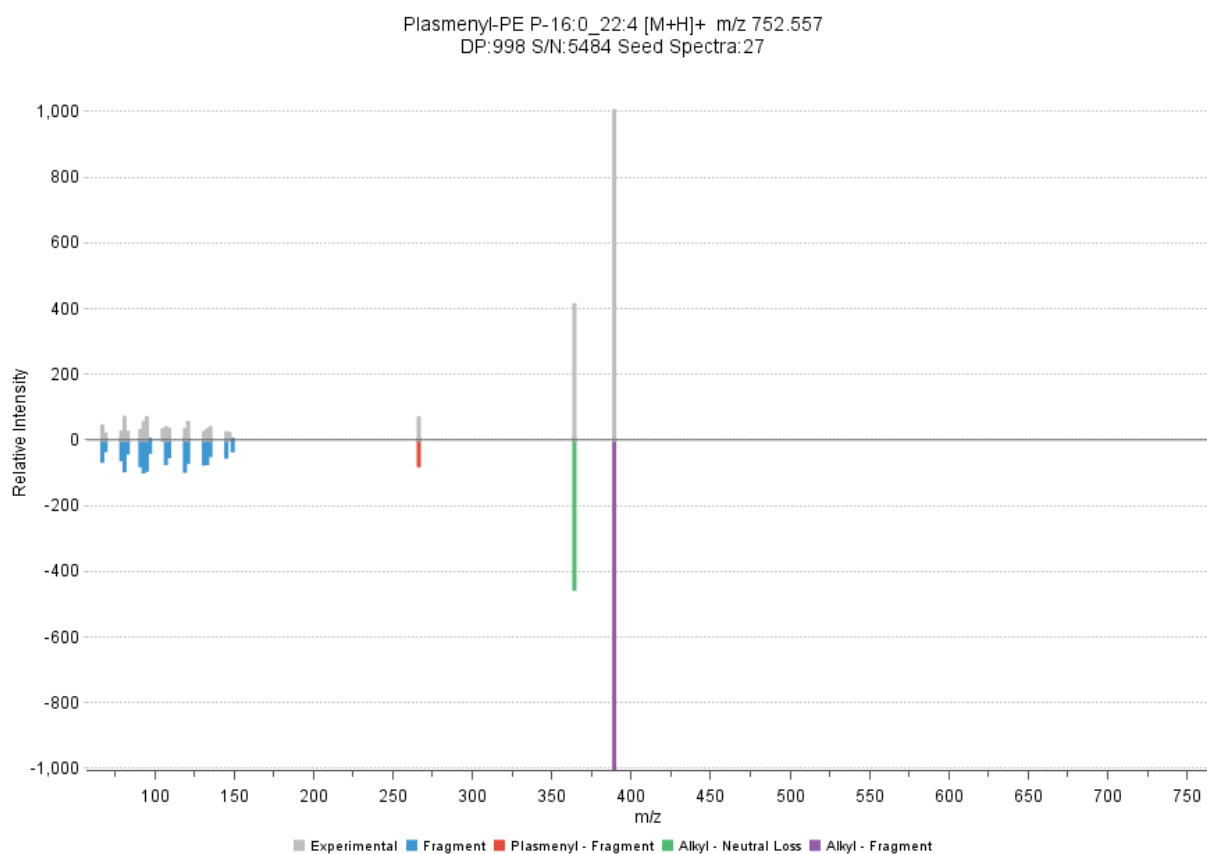

**Supplementary Figure 33:** Representative experimental (grey) and *in silico* (colored) Plasmenyl-PE [M+H]<sup>+</sup> spectra generated from the complex HAP1 extract using the LipiDex HCD Acetate library as the seed library.

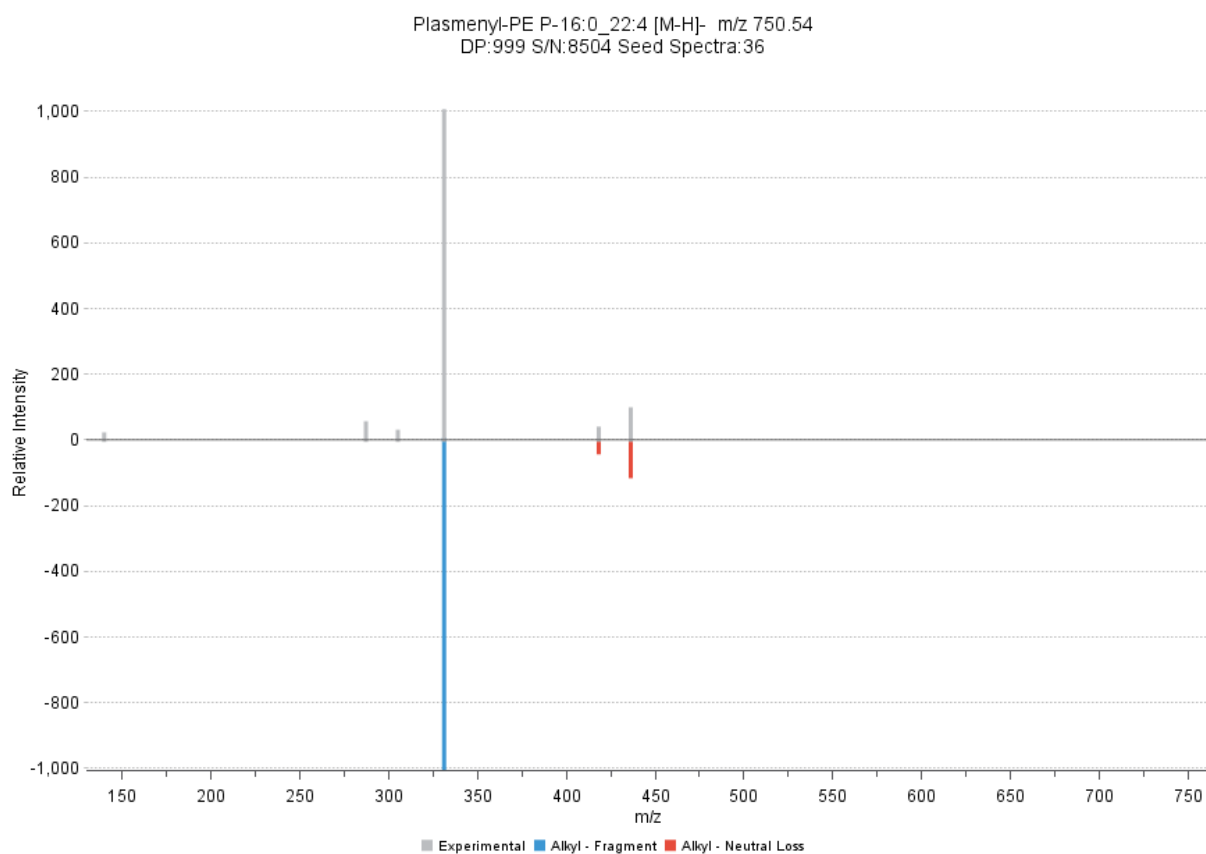

**Supplementary Figure 34:** Representative experimental (grey) and *in silico* (colored) Plasmenyl-PE [M-H]<sup>-</sup> spectra generated from the complex HAP1 extract using the LipiDex HCD Acetate library as the seed library.

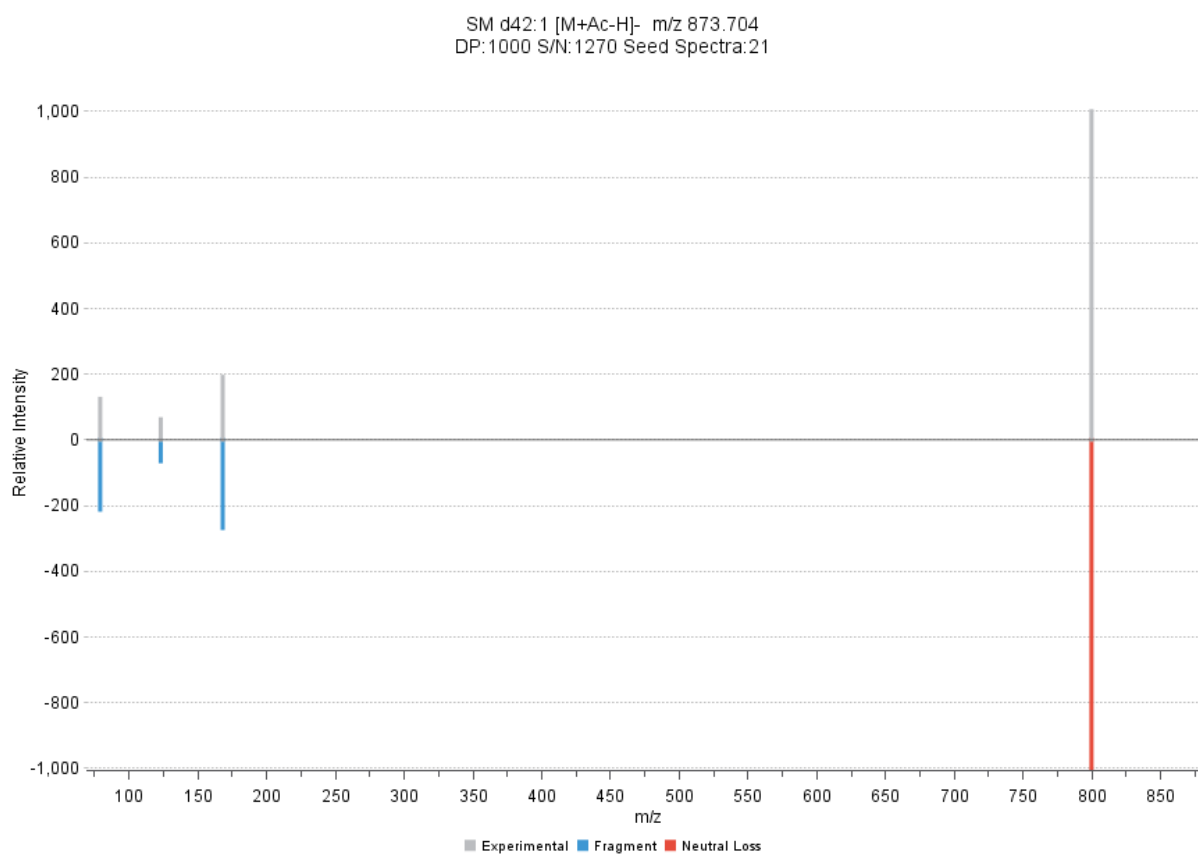

**Supplementary Figure 35:** Representative experimental (grey) and *in silico* (colored) SM [M+Ac-H]<sup>-</sup> spectra generated from the complex HAP1 extract using the LipiDex HCD Acetate library as the seed library.

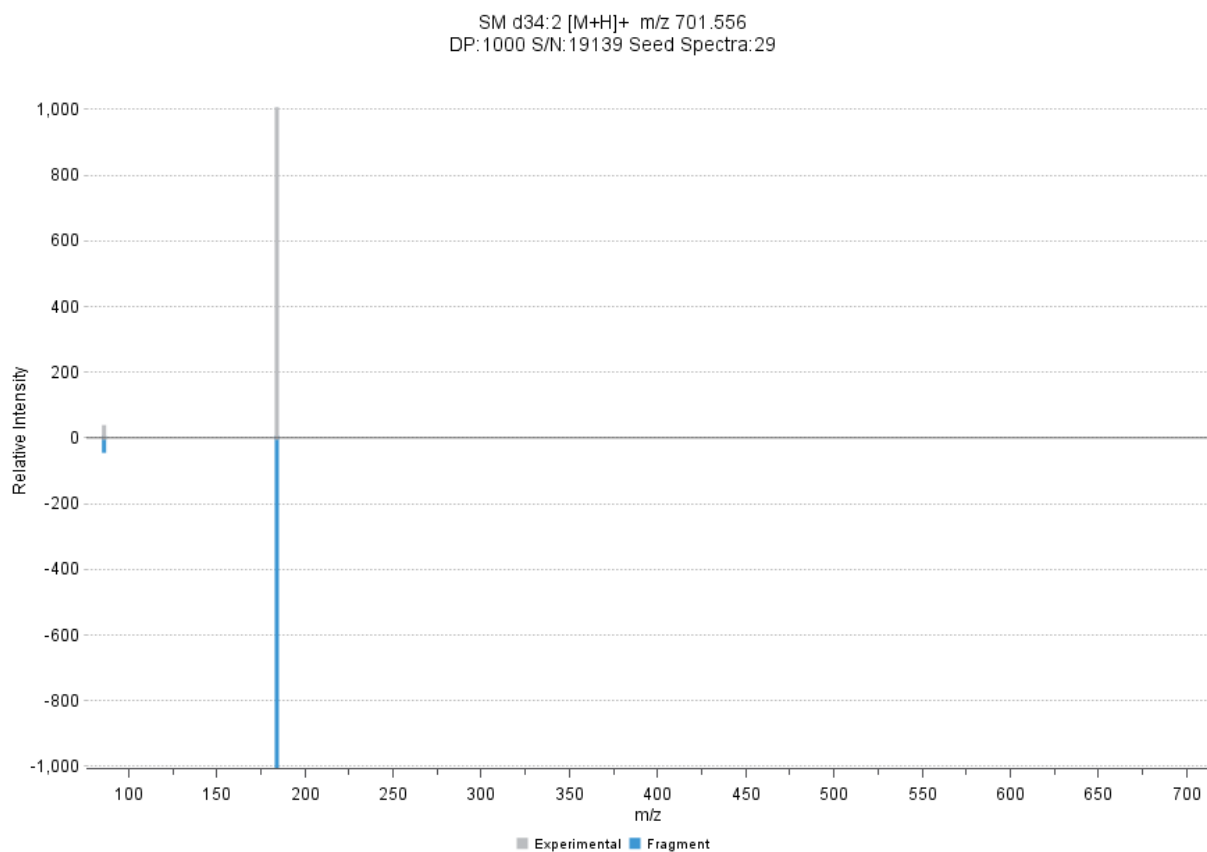

**Supplementary Figure 36:** Representative experimental (grey) and *in silico* (colored) SM [M+H]<sup>+</sup> spectra generated from the complex HAP1 extract using the LipiDex HCD Acetate library as the seed library.

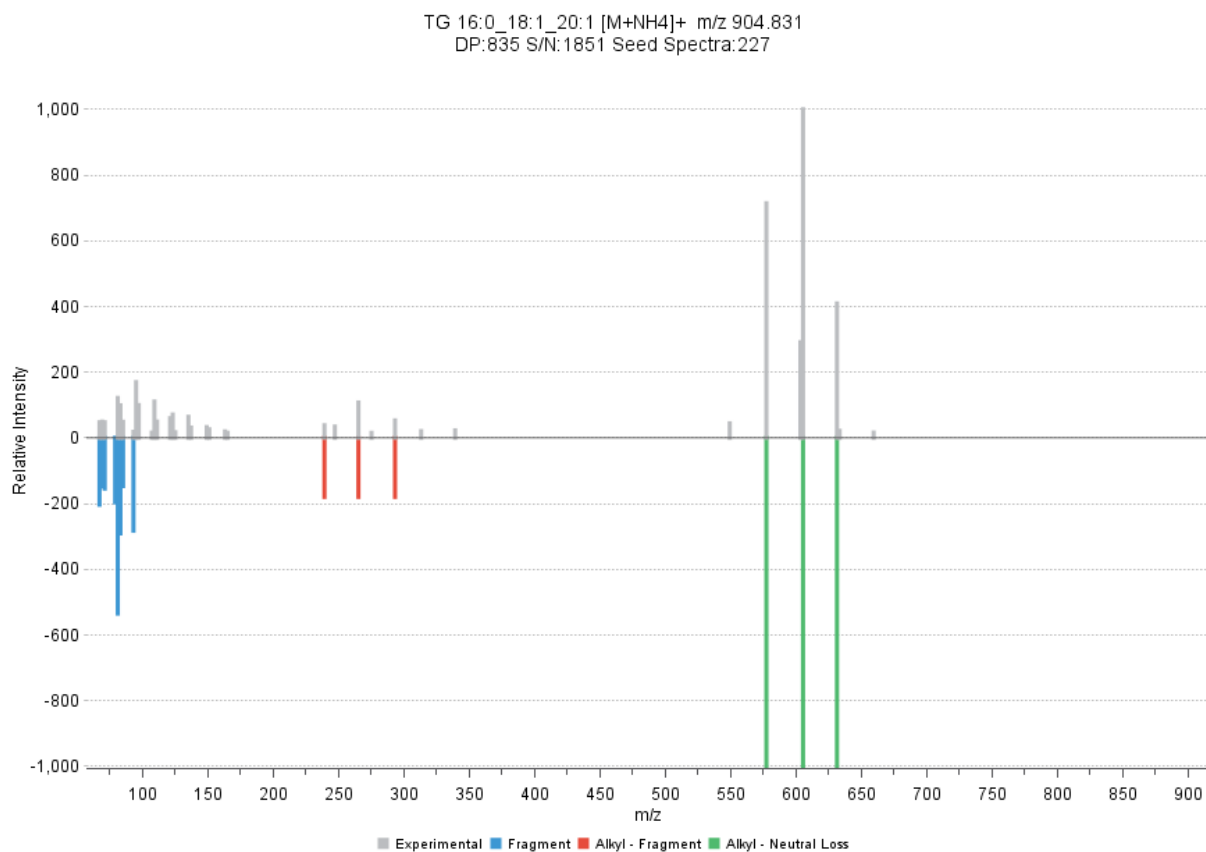

**Supplementary Figure 37:** Representative experimental (grey) and *in silico* (colored) TG [M+NH<sub>4</sub>]<sup>+</sup> spectra generated from the complex HAP1 extract using the LipiDex HCD Acetate library as the seed library.

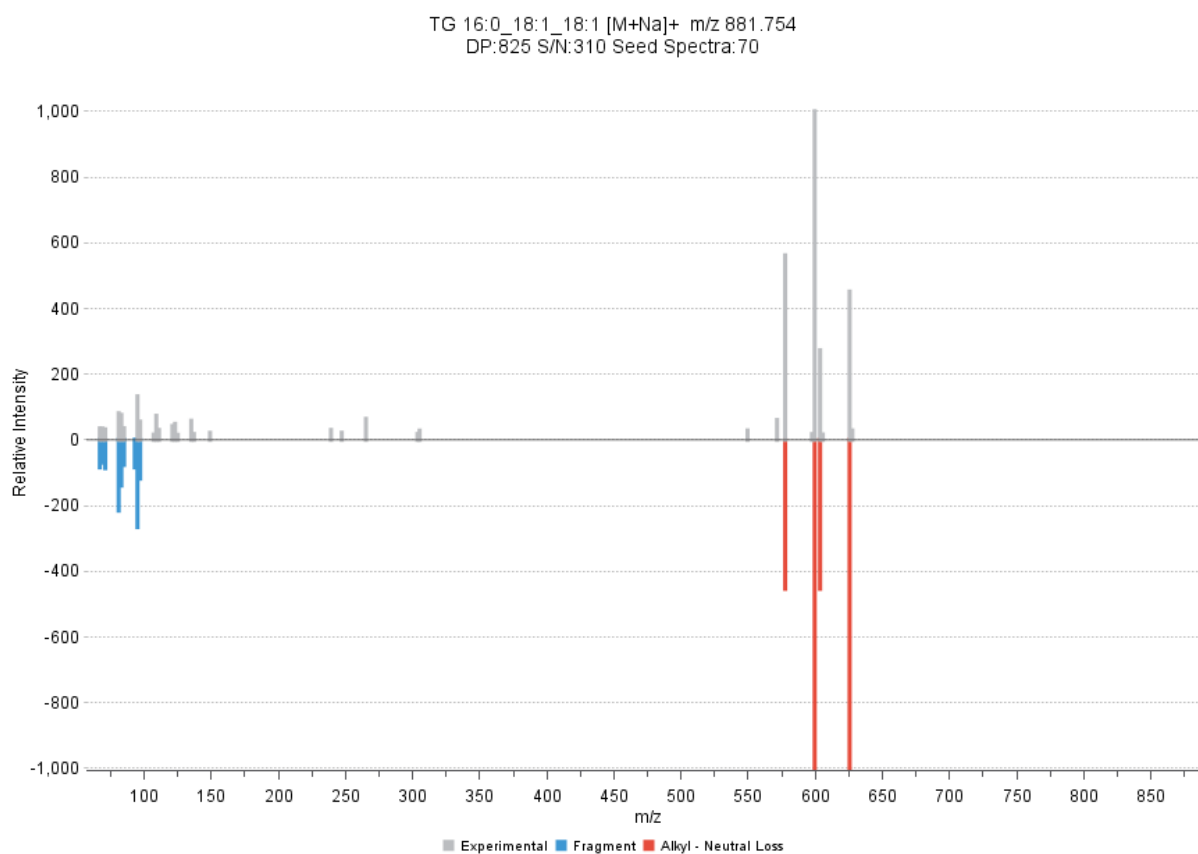

**Supplementary Figure 38:** Representative experimental (grey) and *in silico* (colored) TG [M+NA]<sup>+</sup> spectra generated from the complex HAP1 extract using the LipiDex HCD Acetate library as the seed library.

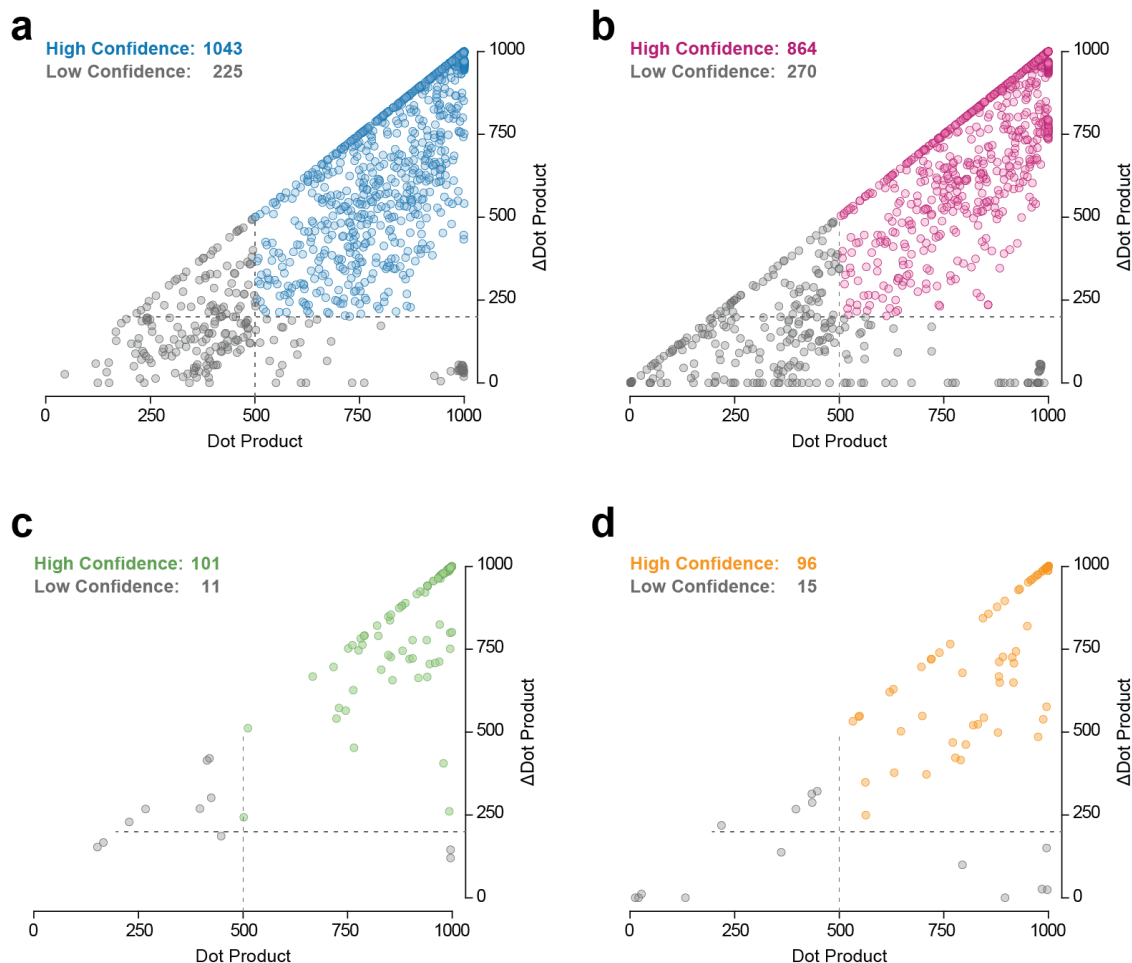

**Supplementary Figure 39:** Identification Confidence using Generated Libraries. Dot product returned and dot product difference between the correct match and the top scoring incorrect match for spectra generated from (A) complex Hap1 cell extract using LipiDex spectral library, (B) complex Hap1 cell extract using LipidBlast spectral library, (C) reference standard mix using HCD, and (D) reference standard mix using CAD. Note: for complex spectra which contained co-fragmented lipid species, these identifications were not counted as incorrect. The score cutoffs used to determine high confidence are meant to give a semi-quantitative value to the number of likely identifications and not a rigorous statistical determination of FDR.

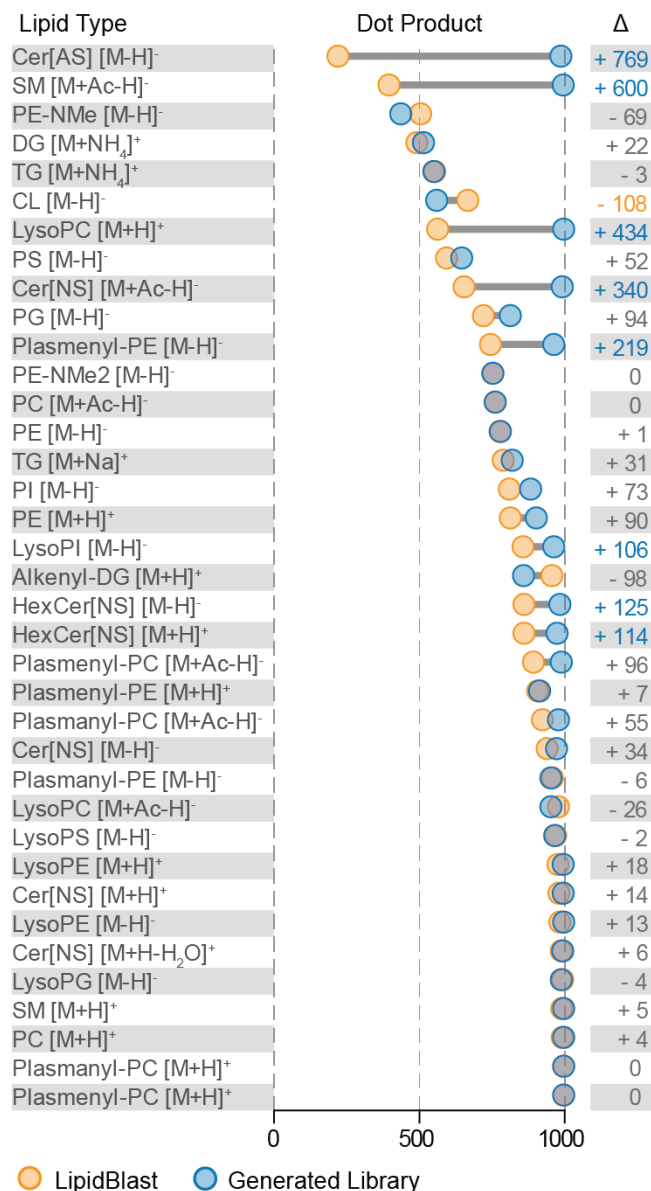

**Supplementary Figure 40:** Dot Product Enhancement after Fragmentation Mapping. Median dot product returned for each lipid class/adduct combination mapped when searching seed MS/MS spectra against the original LipiDex HCD Acetate spectral library (orange) and generated spectral library (blue). The difference between each group is displayed on the right with significantly improved changed dot product scores (>100) highlighted in blue or orange.

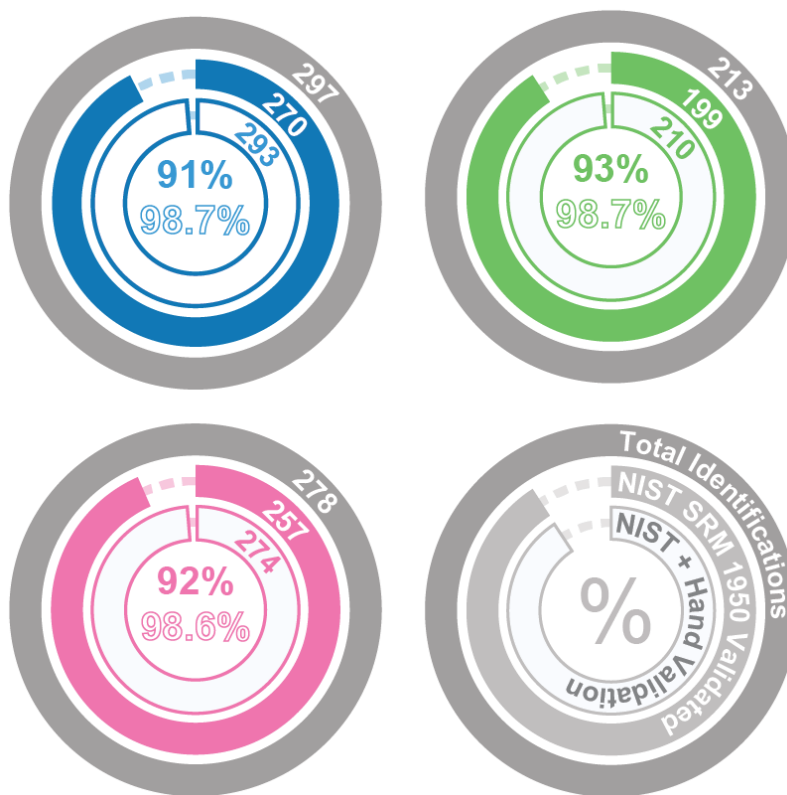

**Supplementary Figure 41. NIST 1950 SRM Validation.** Radial bar charts depicting the number of lipid identifications from LC-MS/MS analysis of the NIST 1950 SRM identified by at least three laboratories (solid color) and additionally hand-validated in **Supplementary Figure 42** (outlined) for the libraries generated *in silico* from complex HAP1 cell extract using the *Lipidex* spectral library (blue), complex HAP1 cell extract using the LipidBlast spectral library (magenta), and reference standard mix using HCD (green).

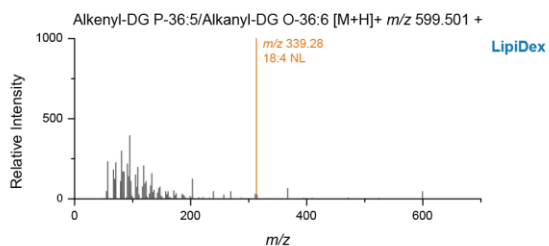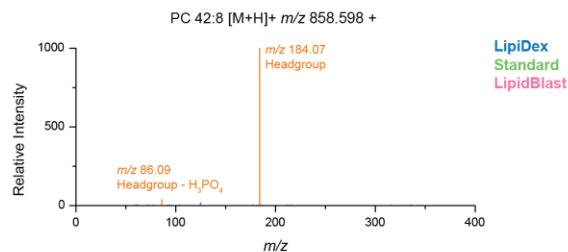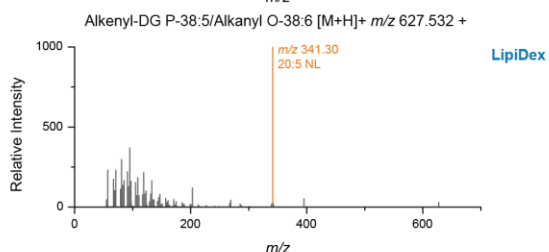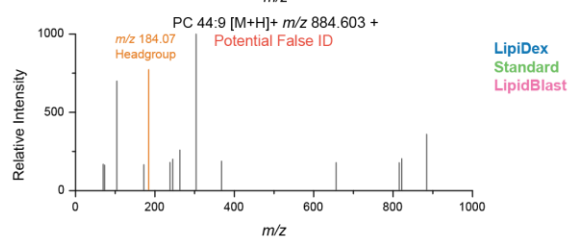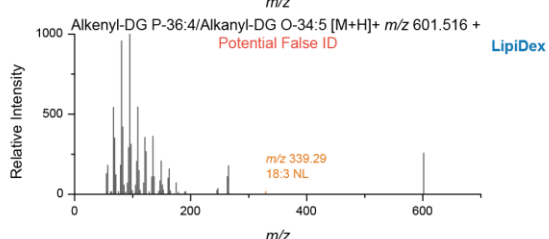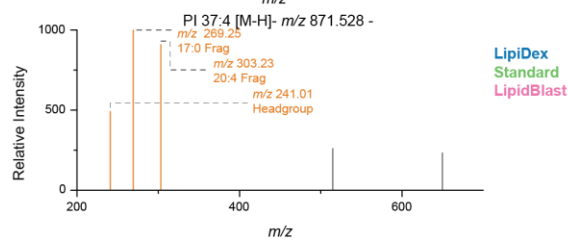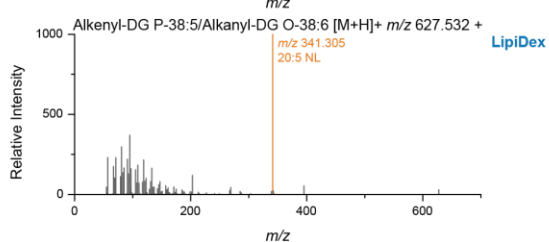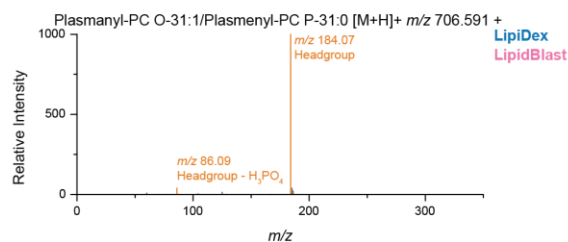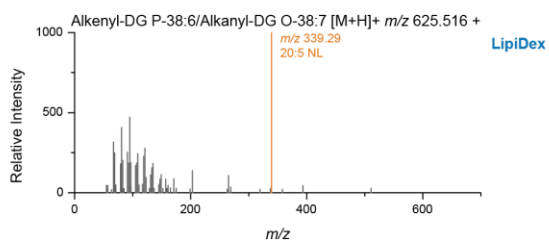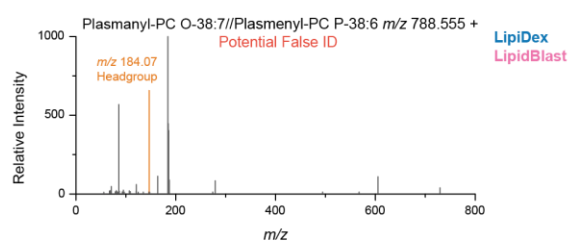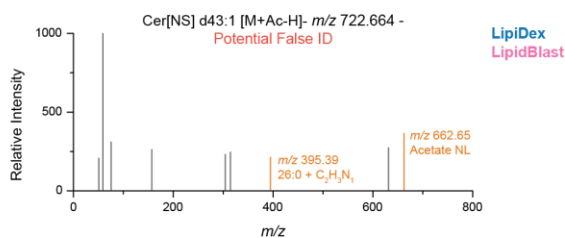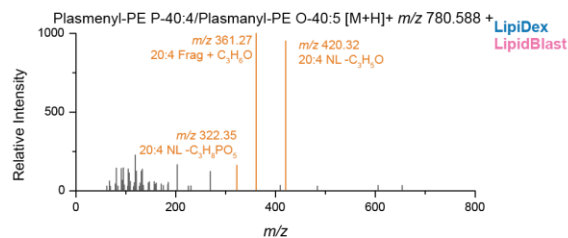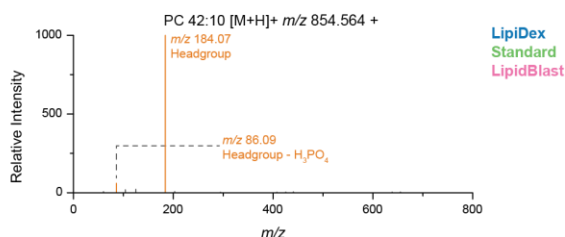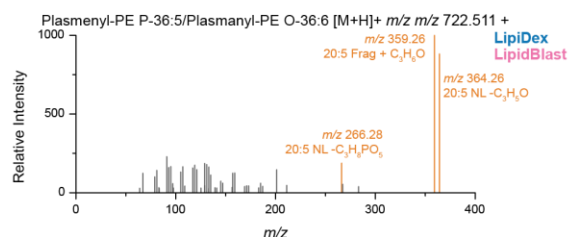

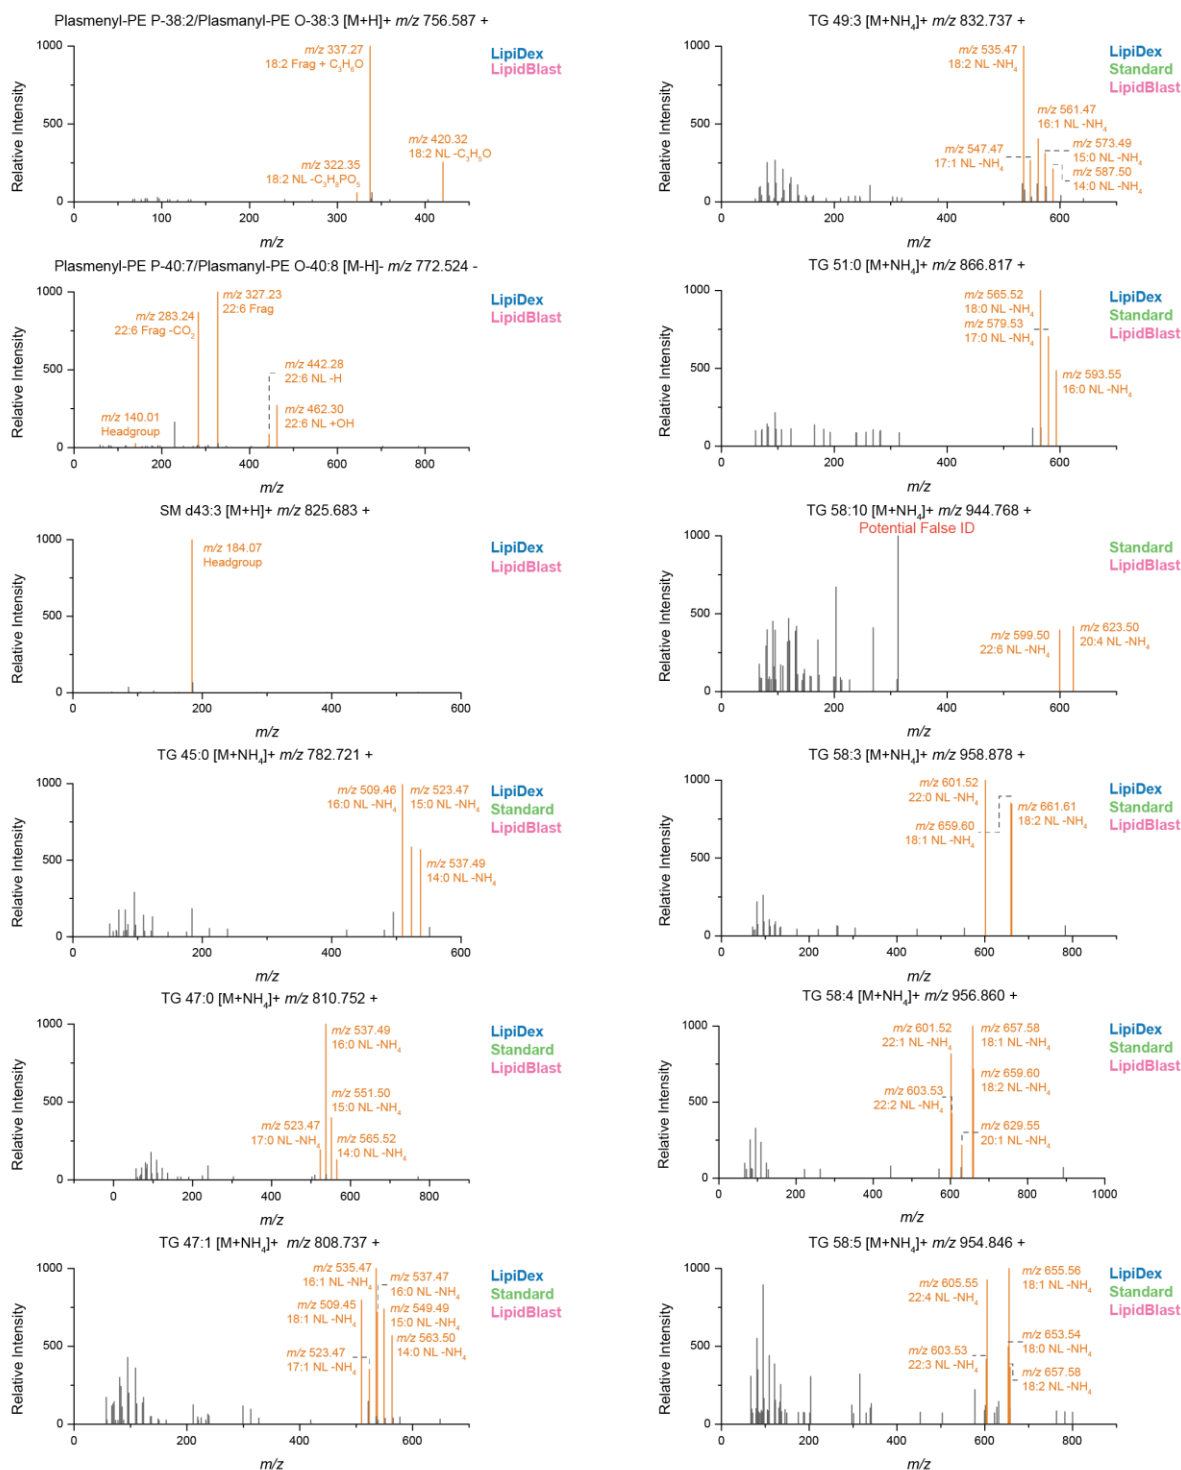

**Supplementary Figure 42. NIST 1950 SRM Identification Manual Validation.** MS/MS spectra for all identifications from LC-MS/MS analysis of the NIST 1950 SRM which were not identified by at least 3 labs from the interlaboratory study. Annotated spectral peaks (orange) which confirm identification are labeled with fragment type. The lipid spectral libraries which generated the identification are displayed adjacent to each spectrum.

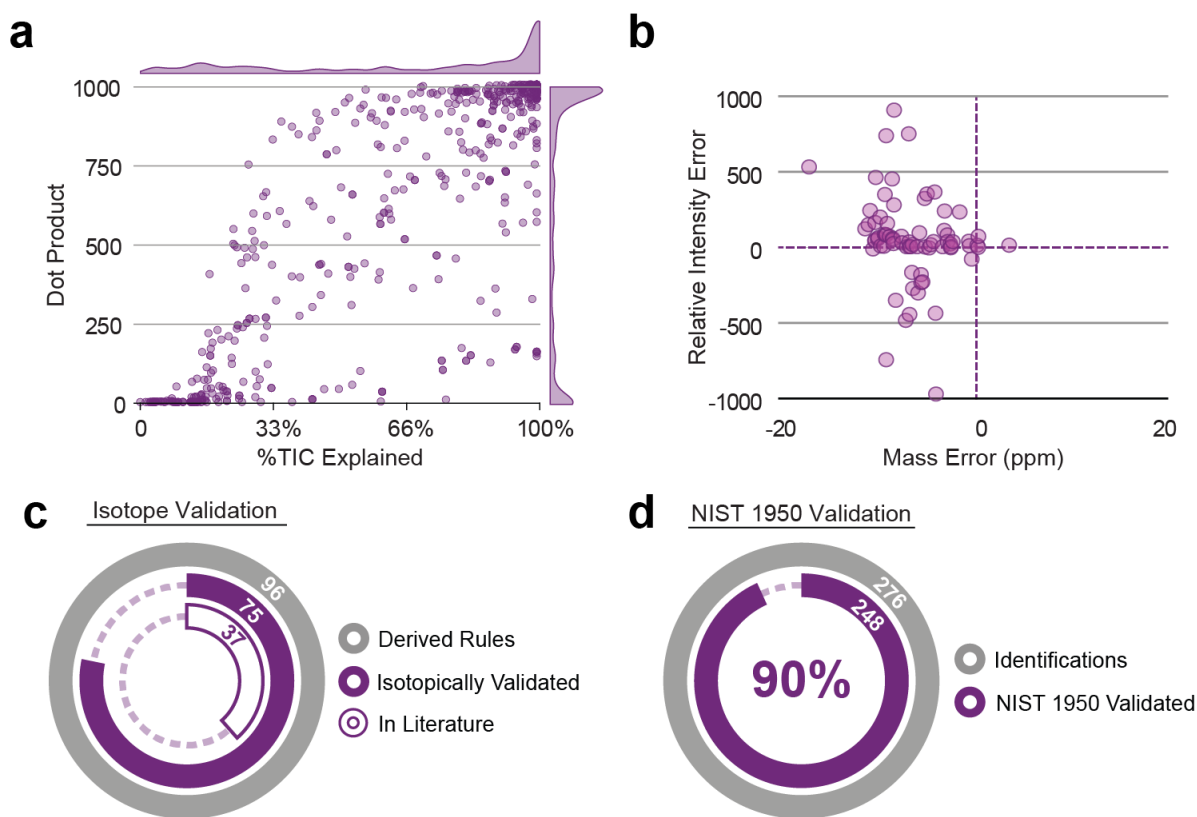

**Supplementary Figure 43. LDA 2 Identification Dataset.** (A) Dot product returned and %TIC explained for seed MS/MS spectra after *in-silico* library generation from complex HAP1 cell extract using LDA 2 lipid identifications. For clarity, the dot product and %TIC explained are additionally displayed as density plots (bin width = 10) on each corresponding axis. (B) Scatter plot depicting the relative intensity error out of 1000 and mass error (ppm) for each derived fragmentation rule. (C) Radial bar chart depicting the number of fragmentation rules validated via isotopically-labeled standards (solid color) and present in external spectral libraries (outlined). (D) Radial bar chart depicting the number of lipid identifications from LC-MS/MS analysis of the NIST 1950 SRM identified by at least three laboratories (solid color).

## References

1. Hutchins, P.D., Russell, J.D., Coon, J.J.: LipiDex: An Integrated Software Package for High-Confidence Lipid Identification. *Cell Syst.* 6, 621–625.e5 (2018). doi:10.1016/j.cels.2018.03.011
